# Supplementary material for: Hydrazide-integrated carbazoles: synthesis, computational, anticancer and molecular docking studies
Source: Royal Society of Chemistry journal article supplement (doi:10.1039/c9nj01912j), 2019-01-01
Supplement: c9nj01912j1.pdf [file c9nj01912j1.pdf]

## **Hydrazone integrated carbazoles: synthesis, computational, anticancer and molecular docking studies**

Kannan Gokula Krishnan<sup>a</sup>, Pathinettampadi Ashothai<sup>b</sup>, Krishnaraj Padmavathy<sup>a</sup>, Wei-Meng Lim<sup>c</sup>, Chun-Wai Mai<sup>c,d</sup>, Punniyakoti V Thanikachalam<sup>c</sup> Chennan Ramalingan<sup>a,\*</sup>

<sup>a</sup>*Department of Chemistry, School of Advanced Sciences (SAS), Kalasalingam Academy of Research and Education (Deemed to be University), Krishnankoil - 626 126, Tamilnadu, India*

<sup>b</sup>*Department of Chemistry, Lady Doak College, Madurai - 625 002, Tamilnadu, India*

<sup>c</sup>*School of Pharmacy, International Medical University, 126 Jalan Jalil Perkasa 19, 57000, Bukit Jalil, Kuala Lumpur, Malaysia.*

<sup>d</sup>*Center for Cancer and Stem Cell Research, Institute for Research, Development and Innovation (IRDI), International Medical University, 126, Jalan Jalil Perkasa 19, 57000, Bukit Jalil, Kuala Lumpur, Malaysia.*

\* *Corresponding author: ramalinganc@gmail.com; c.ramalingan@klu.ac.in (C. Ramalingan)*

### **SUPPLEMENTARY INFORMATION**

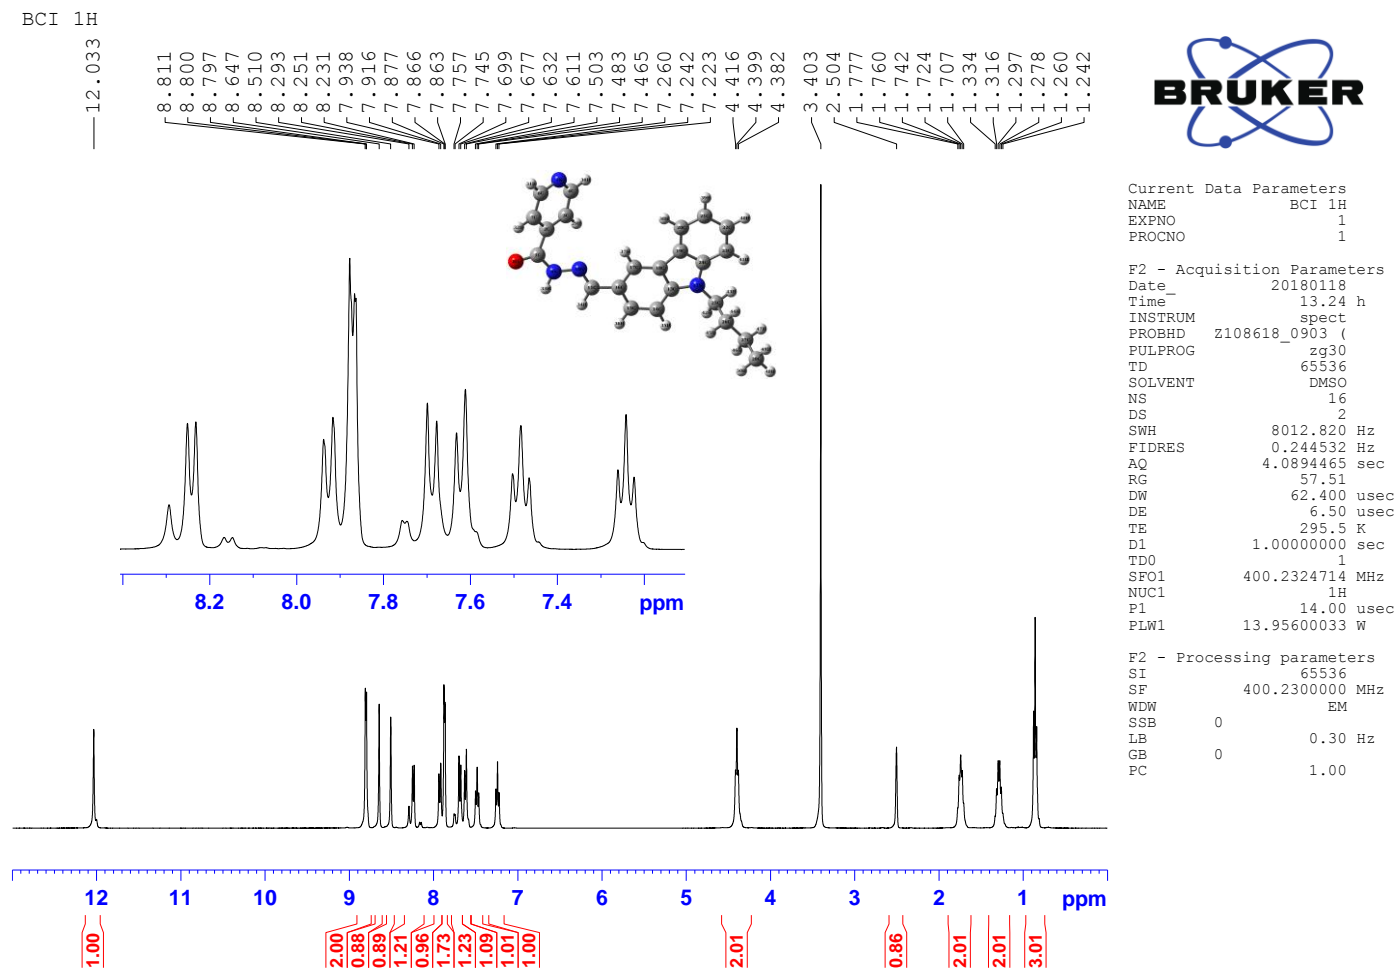

Figure S1.  $^1\text{H}$  NMR spectrum of hydrazone integrated carbazole **6a**.

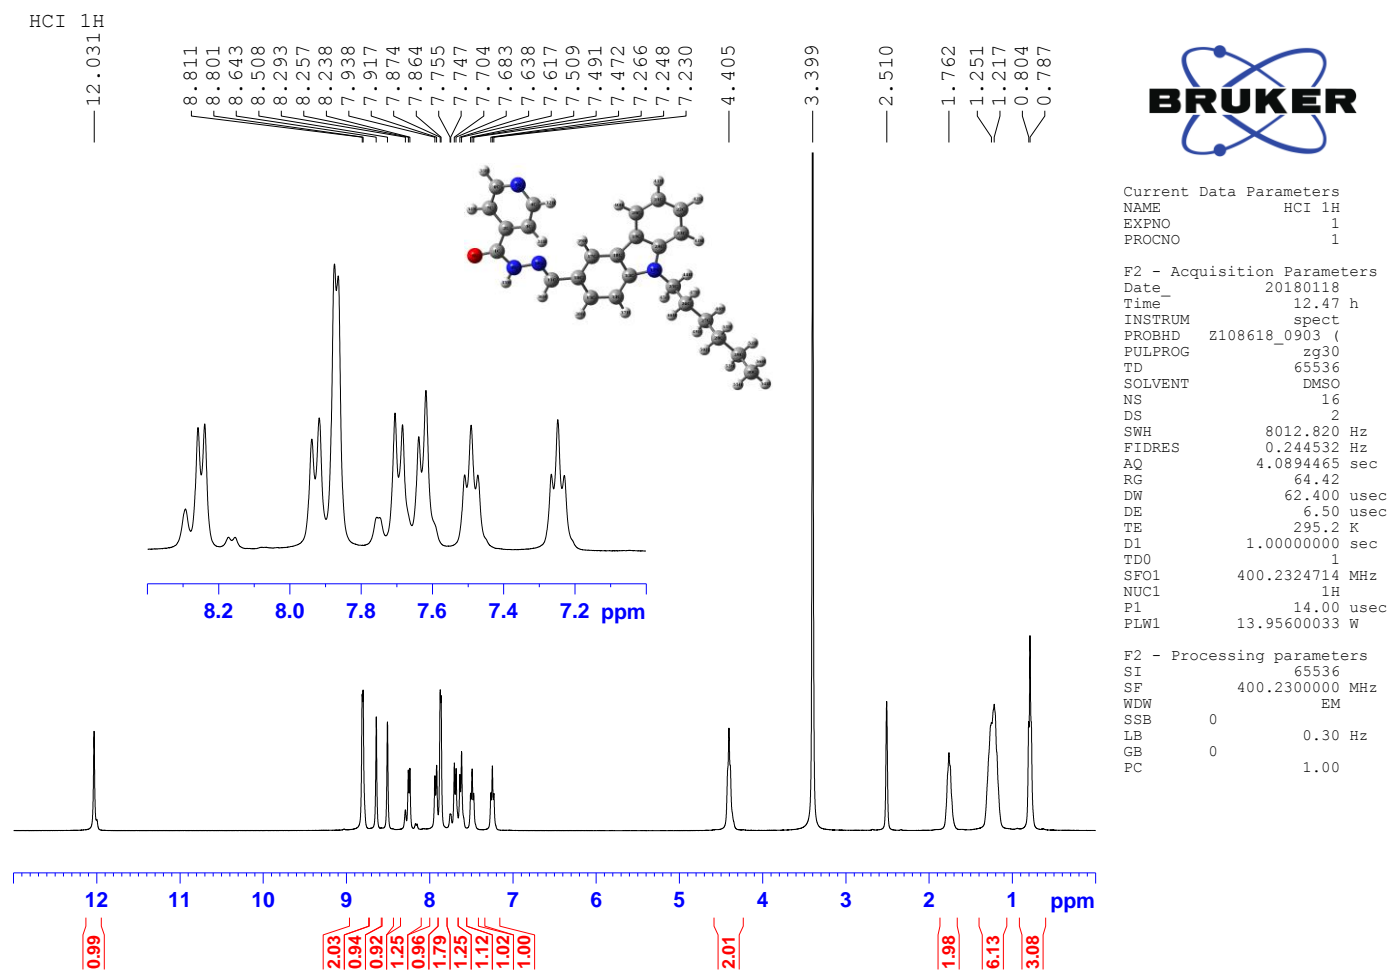

**Figure S2.**  $^1\text{H}$  NMR spectrum of hydrazone integrated carbazole **6b**.

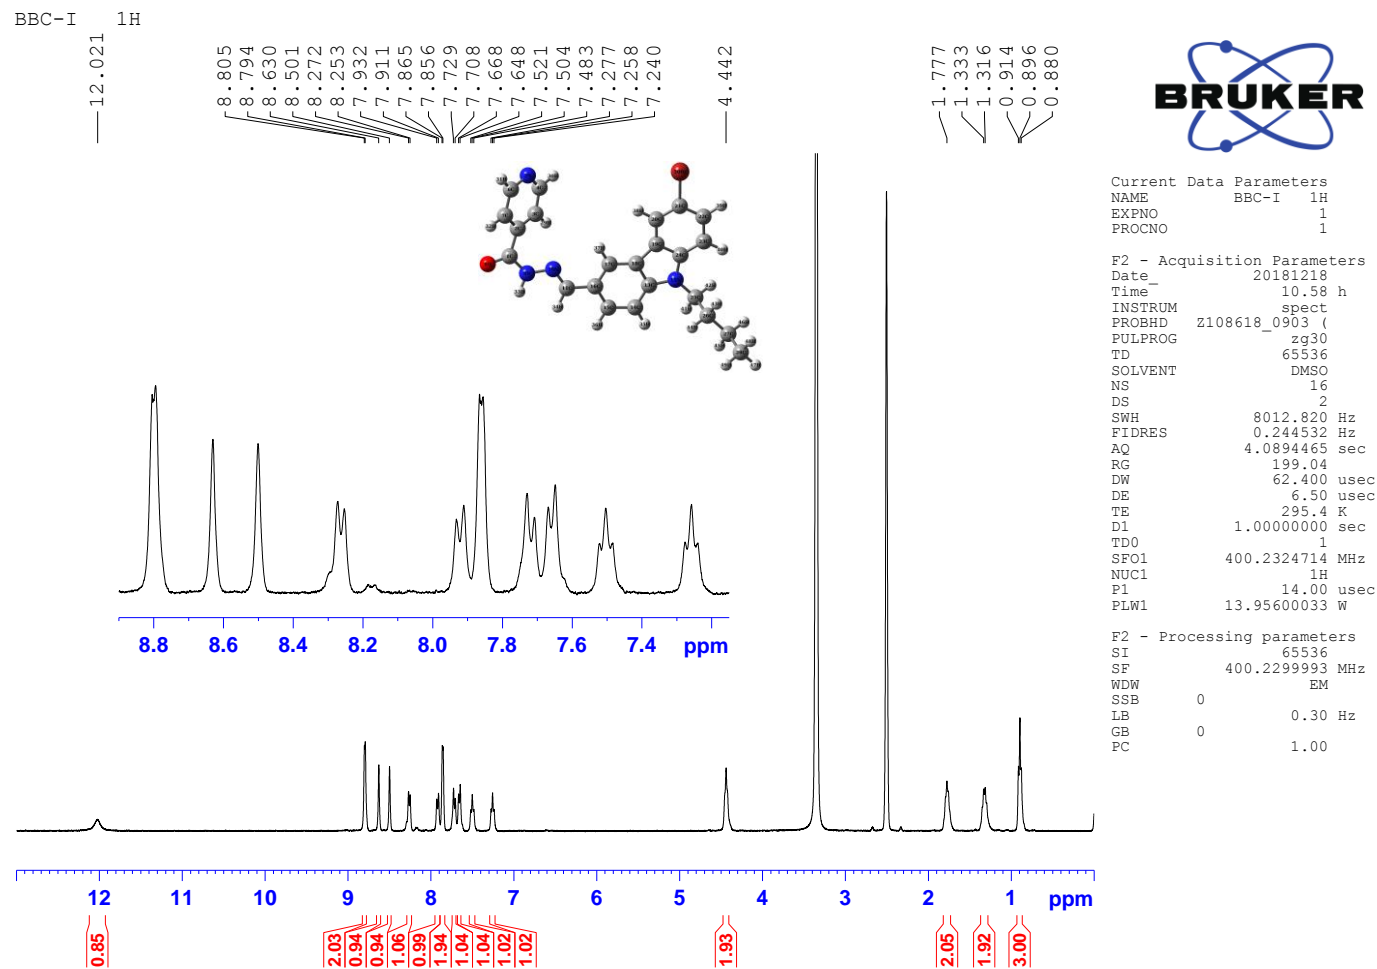

Figure S3. <sup>1</sup>H NMR spectrum of hydrazone integrated carbazole **6c**.

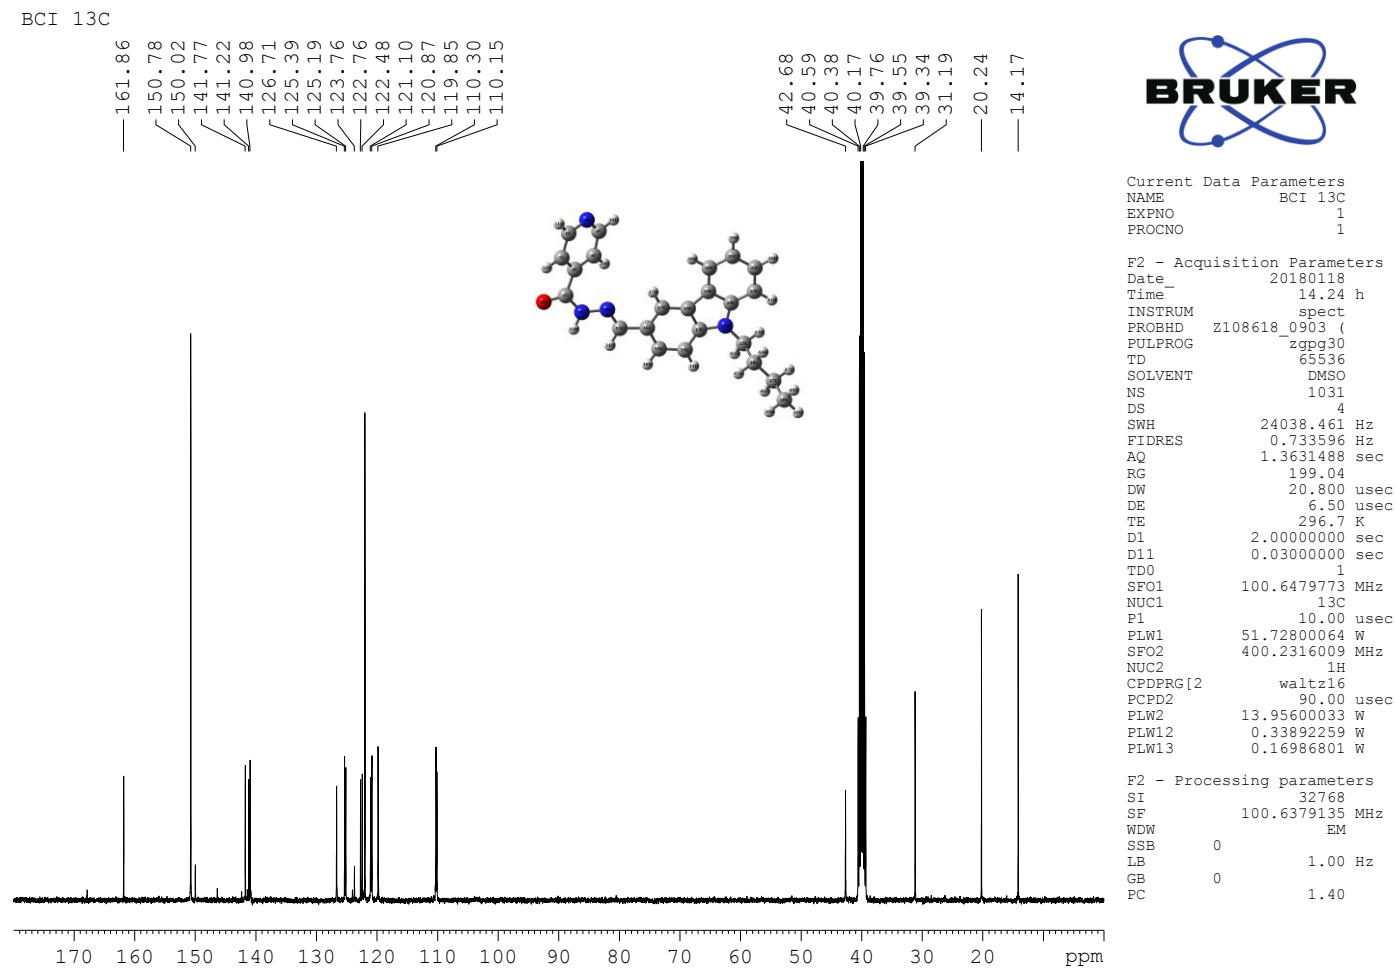

**Figure S4.**  $^{13}\text{C}$  NMR spectrum of hydrazone integrated carbazole **6a**.

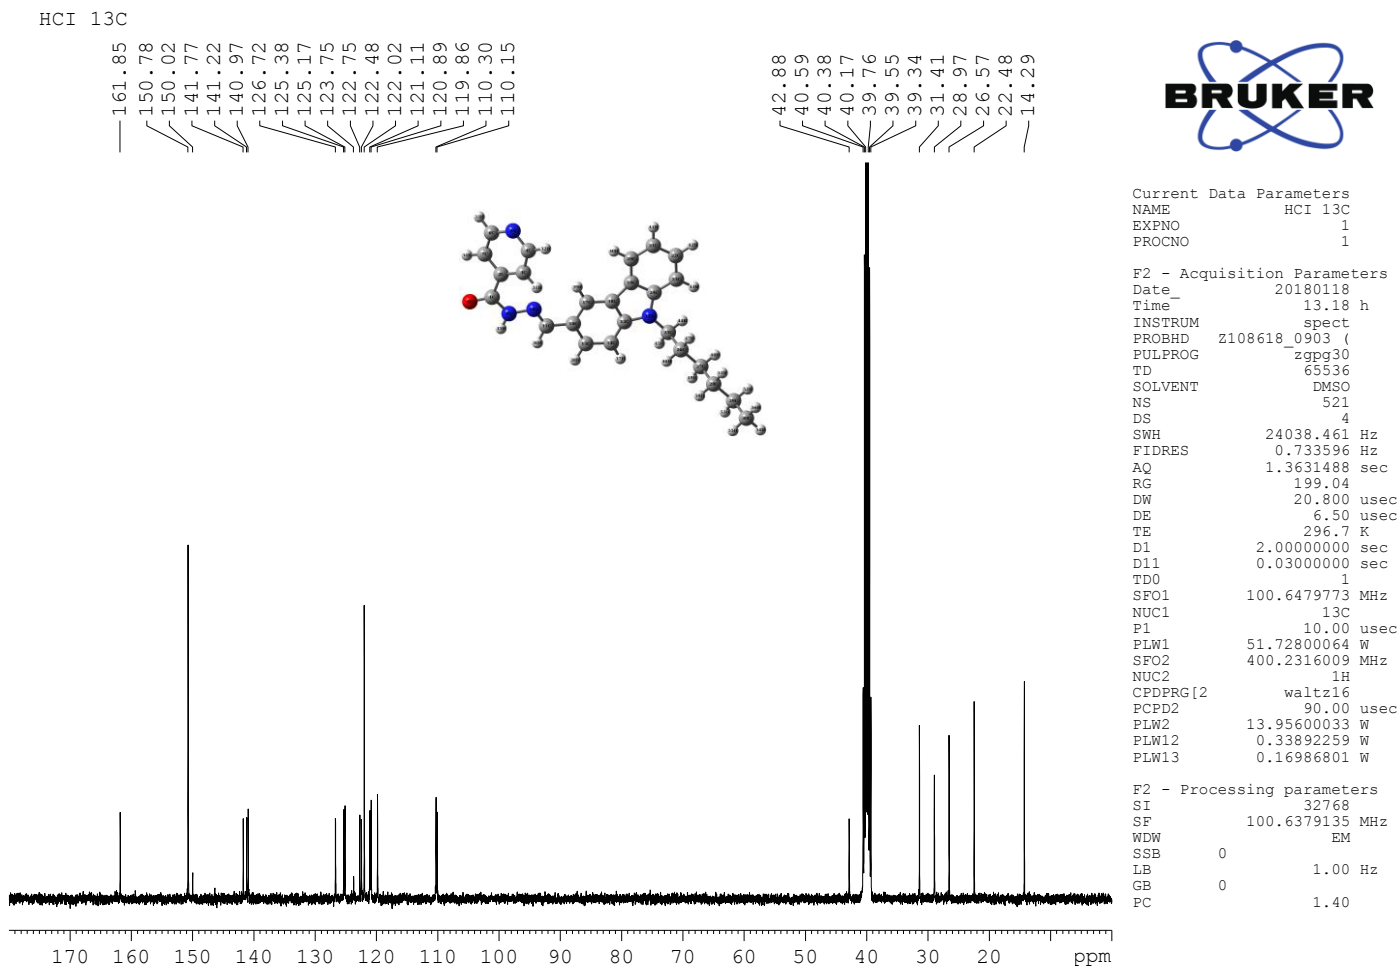

Figure S5.  $^{13}\text{C}$  NMR spectrum of hydrazide integrated carbazole **6b**.

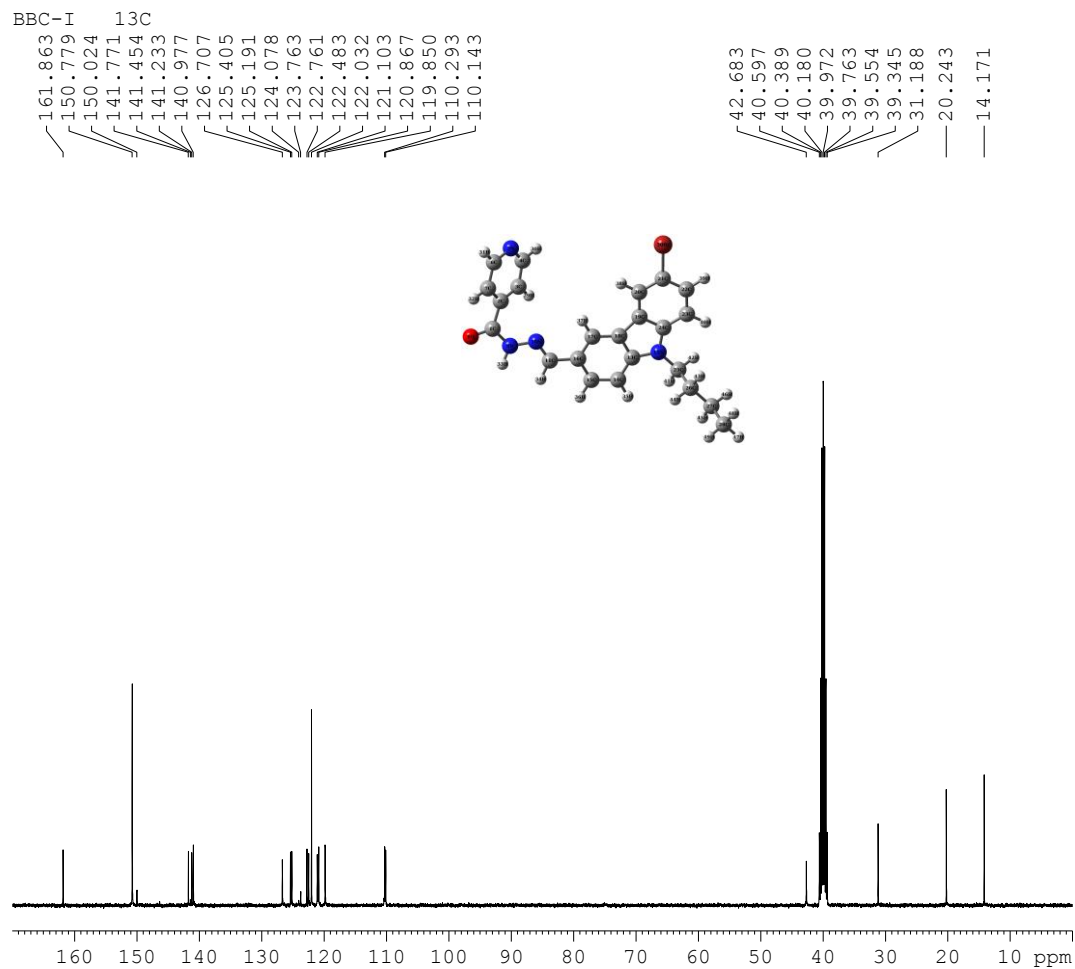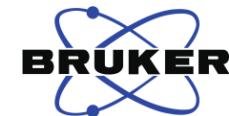

Current Data Parameters  
 NAME BBC-I 13C  
 EXPNO 1  
 PROCNO 1

F2 - Acquisition Parameters  
 Date\_ 20181218  
 Time\_ 11.28 h  
 INSTRUM spect  
 PROBHD Z108618\_0903 (  
 PULPROG zgpg30  
 TD 65536  
 SOLVENT DMSO  
 NS 425  
 DS 4  
 SWH 24038.461 Hz  
 FIDRES 0.733596 Hz  
 AQ 1.3631488 sec  
 RG 199.04  
 DW 20.800 usec  
 DE 6.50 usec  
 TE 296.6 K  
 D1 2.0000000 sec  
 D11 0.0300000 sec  
 TD0 1  
 SF01 100.6479773 MHz  
 NUC1 13C  
 F1 10.00 usec  
 PLW1 51.72800064 W  
 SF02 400.2316009 MHz  
 NUC2 1H  
 CPDPRG[2] waltz16  
 PCPD2 90.00 usec  
 PLW2 13.95600033 W  
 PLW12 0.33892259 W  
 PLW13 0.16986801 W

F2 - Processing parameters  
 SI 32768  
 SF 100.6379135 MHz  
 WDW EM  
 SSB 0  
 LB 1.00 Hz  
 GB 0  
 PC 1.40

**Figure S6.** <sup>13</sup>C NMR spectrum of hydrazone integrated carbazole **6c**.

**Table S1a.** Selected bond lengths, bond angles and dihedral angles of hydrazides **6a-c**

| Hydrazide <b>6a</b> |       | Hydrazide <b>6b</b> |       | Hydrazide <b>6c</b> |       |
|---------------------|-------|---------------------|-------|---------------------|-------|
| Bond length         | [Å]   | Bond length         | [Å]   | Bond length         | [Å]   |
| C1-C2               | 1.503 | C1-C2               | 1.503 | C1-C2               | 1.502 |
| C1-O8               | 1.220 | C1-O8               | 1.220 | C1-O8               | 1.219 |
| C1-N9               | 1.380 | C1-N9               | 1.380 | C1-N9               | 1.382 |
| C2-C3               | 1.397 | C2-C3               | 1.397 | C2-C3               | 1.396 |
| C2-C7               | 1.397 | C2-C7               | 1.397 | C2-C7               | 1.397 |
| C3-C4               | 1.394 | C3-C4               | 1.394 | C3-C4               | 1.393 |
| C4-N5               | 1.336 | C4-N5               | 1.336 | C4-N5               | 1.336 |
| N5-C6               | 1.337 | N5-C6               | 1.337 | N5-C6               | 1.337 |
| C6-C7               | 1.390 | C6-C7               | 1.390 | C6-C7               | 1.390 |
| N9-N10              | 1.360 | N9-N10              | 1.360 | N9-N10              | 1.359 |
| N10-C11             | 1.282 | N10-C11             | 1.282 | N10-C11             | 1.282 |
| C11-C16             | 1.459 | C11-C16             | 1.459 | C11-C16             | 1.460 |
| N12-C13             | 1.384 | N12-C13             | 1.383 | N12-C13             | 1.384 |
| N12-C24             | 1.393 | N12-C24             | 1.393 | N12-C24             | 1.391 |
| N12-C25             | 1.455 | N12-C25             | 1.455 | N12-C25             | 1.456 |
| C13-C14             | 1.397 | C13-C14             | 1.397 | C13-C14             | 1.397 |
| C13-C18             | 1.424 | C13-C18             | 1.424 | C13-C18             | 1.423 |
| C14-C15             | 1.388 | C14-C15             | 1.388 | C14-C15             | 1.387 |
| C15-C16             | 1.411 | C15-C16             | 1.411 | C15-C16             | 1.412 |
| C16-C17             | 1.402 | C16-C17             | 1.402 | C16-C17             | 1.401 |
| C17-C18             | 1.389 | C17-C18             | 1.389 | C17-C18             | 1.389 |
| C18-C19             | 1.448 | C18-C19             | 1.448 | C18-C19             | 1.448 |
| C19-C20             | 1.397 | C19-C20             | 1.397 | C19-C20             | 1.397 |
| C19-C24             | 1.417 | C19-C24             | 1.418 | C19-C24             | 1.417 |
| C20-C21             | 1.390 | C20-C21             | 1.390 | C20-C21             | 1.387 |
| C21-C22             | 1.403 | C21-C22             | 1.403 | C21-C22             | 1.401 |
| C22-C23             | 1.391 | C22-C23             | 1.391 | C21-Br50            | 1.921 |
| C23-C24             | 1.396 | C23-C24             | 1.396 | C22-C23             | 1.391 |
| C25-C26             | 1.535 | C25-C26             | 1.535 | C23-C24             | 1.395 |
| C26-C27             | 1.533 | C26-C27             | 1.533 | C25-C26             | 1.535 |
| C27-C28             | 1.531 | C27-C28             | 1.533 | C26-C27             | 1.533 |
|                     |       | C28-C29             | 1.533 | C27-C28             | 1.531 |
|                     |       | C29-C30             | 1.531 |                     |       |



| Bond angle  | [°]   | Bond angle  | [°]   | Bond angle   | [°]   |
|-------------|-------|-------------|-------|--------------|-------|
| C2-C1-O8    | 121.2 | C2-C1-O8    | 121.2 | C2-C1-O8     | 121.4 |
| C2-C1-N9    | 120.1 | C2-C1-N9    | 120.1 | C2-C1-N9     | 119.9 |
| O8-C1-N9    | 118.7 | O8-C1-N9    | 118.7 | O8-C1-N9     | 118.7 |
| C1-C2-C3    | 125.4 | C1-C2-C3    | 125.4 | C1-C2-C3     | 125.2 |
| C1-C2-C7    | 116.6 | C1-C2-C7    | 116.6 | C1-C2-C7     | 116.8 |
| C3-C2-C7    | 117.8 | C3-C2-C7    | 117.8 | C3-C2-C7     | 117.9 |
| C2-C3-C4    | 118.5 | C2-C3-C4    | 118.5 | C2-C3-C4     | 118.5 |
| C3-C4-N5    | 124.1 | C3-C4-N5    | 124.1 | C3-C4-N5     | 124.0 |
| C4-N5-C6    | 116.9 | C4-N5-C6    | 116.9 | C4-N5-C6     | 117.0 |
| N5-C6-C7    | 123.7 | N5-C6-C7    | 123.7 | N5-C6-C7     | 123.7 |
| C2-C7-C6    | 119.0 | C2-C7-C6    | 119.0 | C2-C7-C6     | 118.9 |
| C1-N9-N10   | 125.7 | C1-N9-N10   | 125.7 | C1-N9-N10    | 125.5 |
| N9-N10-C11  | 117.0 | N9-N10-C11  | 117.0 | N9-N10-C11   | 117.1 |
| N10-C11-C16 | 122.9 | N10-C11-C16 | 122.9 | N10-C11-C16  | 122.7 |
| C13-N12-C24 | 108.7 | C13-N12-C24 | 108.7 | C13-N12-C24  | 108.6 |
| C13-N12-C25 | 125.8 | C13-N12-C25 | 125.7 | C13-N12-C25  | 125.8 |
| C24-N12-C25 | 125.5 | C24-N12-C25 | 125.6 | C24-N12-C25  | 125.6 |
| N12-C13-C14 | 129.8 | N12-C13-C14 | 129.7 | N12-C13-C14  | 129.7 |
| N12-C13-C18 | 109.2 | N12-C13-C18 | 109.2 | N12-C13-C18  | 109.2 |
| C14-C13-C18 | 121.1 | C14-C13-C18 | 121.1 | C14-C13-C18  | 121.1 |
| C13-C14-C15 | 117.9 | C13-C14-C15 | 117.9 | C13-C14-C15  | 117.8 |
| C14-C15-C16 | 122.1 | C14-C15-C16 | 122.1 | C14-C15-C16  | 122.1 |
| C11-C16-C15 | 118.7 | C11-C16-C15 | 118.6 | C11-C16-C15  | 118.7 |
| C11-C16-C17 | 121.9 | C11-C16-C17 | 121.9 | C11-C16-C17  | 121.9 |
| C15-C16-C17 | 119.5 | C15-C16-C17 | 119.5 | C15-C16-C17  | 119.5 |
| C16-C17-C18 | 119.5 | C16-C17-C18 | 119.5 | C16-C17-C18  | 119.4 |
| C13-C18-C17 | 119.9 | C13-C18-C17 | 119.9 | C13-C18-C17  | 120.0 |
| C13-C18-C19 | 106.5 | C13-C18-C19 | 106.5 | C13-C18-C19  | 106.4 |
| C17-C18-C19 | 133.6 | C17-C18-C19 | 133.6 | C17-C18-C19  | 133.6 |
| C18-C19-C20 | 133.8 | C18-C19-C20 | 133.8 | C18-C19-C20  | 133.3 |
| C18-C19-C24 | 106.5 | C18-C19-C24 | 106.6 | C18-C19-C24  | 106.6 |
| C20-C19-C24 | 119.6 | C20-C19-C24 | 119.6 | C20-C19-C24  | 120.1 |
| C19-C20-C21 | 119.1 | C19-C20-C21 | 119.1 | C19-C20-C21  | 118.1 |
| C20-C21-C22 | 120.6 | C20-C21-C22 | 120.6 | C20-C21-C22  | 122.0 |
| C21-C22-C23 | 121.4 | C21-C22-C23 | 121.5 | C20-C21-Br50 | 119.2 |

|                 |        |                 |        |                 |        |
|-----------------|--------|-----------------|--------|-----------------|--------|
| C22-C23-C24     | 117.8  | C22-C23-C24     | 117.8  | C22-C21-Br50    | 118.7  |
| N12-C24-C19     | 109.1  | N12-C24-C19     | 109.1  | C21-C22-C23     | 120.4  |
| N12-C24-C23     | 129.4  | N12-C24-C23     | 129.4  | C22-C23-C24     | 118.2  |
| C19-C24-C23     | 121.5  | C19-C24-C23     | 121.4  | N12-C24-C19     | 109.2  |
| N12-C25-C26     | 113.8  | N12-C25-C26     | 113.8  | N12-C24-C23     | 129.6  |
| C25-C26-C27     | 112.5  | C25-C26-C27     | 112.5  | C19-C24-C23     | 121.2  |
| C26-C27-C28     | 113.0  | C26-C27-C28     | 113.3  | N12-C25-C26     | 113.8  |
|                 |        | C27-C28-C29     | 113.6  | C25-C26-C27     | 112.4  |
|                 |        | C28-C29-C30     | 113.2  | C26-C27-C28     | 113.0  |
| Dihedral angle  | [°]    | Dihedral angle  | [°]    | Dihedral angle  | [°]    |
| O8-C1-C2-C3     | -149.6 | O8-C1-C2-C3     | 149.3  | O8-C1-C2-C3     | -148.0 |
| O8-C1-C2-C7     | 25.7   | O8-C1-C2-C7     | -26.0  | O8-C1-C2-C7     | 27.1   |
| N9-C1-C2-C3     | 29.8   | N9-C1-C2-C3     | -30.0  | N9-C1-C2-C3     | 31.1   |
| N9-C1-C2-C7     | -154.9 | N9-C1-C2-C7     | 154.7  | N9-C1-C2-C7     | -153.8 |
| C2-C1-N9-N10    | 12.0   | C2-C1-N9-N10    | -12.0  | C2-C1-N9-N10    | 13.2   |
| O8-C1-N9-N10    | -168.6 | O8-C1-N9-N10    | 168.6  | O8-C1-N9-N10    | -167.7 |
| C1-C2-C3-C4     | 175.8  | C1-C2-C3-C4     | -175.7 | C1-C2-C3-C4     | 175.5  |
| C7-C2-C3-C4     | 0.5    | C7-C2-C3-C4     | -0.5   | C7-C2-C3-C4     | 0.5    |
| C1-C2-C7-C6     | -177.2 | C1-C2-C7-C6     | 177.2  | C1-C2-C7-C6     | -177.0 |
| C3-C2-C7-C6     | -1.5   | C3-C2-C7-C6     | 1.5    | C3-C2-C7-C6     | -1.5   |
| C2-C3-C4-N5     | 0.8    | C2-C3-C4-N5     | -0.8   | C2-C3-C4-N5     | 0.9    |
| C3-C4-N5-C6     | -1.0   | C3-C4-N5-C6     | 1.0    | C3-C4-N5-C6     | -1.0   |
| C4-N5-C6-C7     | 0.0    | C4-N5-C6-C7     | 0.1    | C4-N5-C6-C7     | -0.1   |
| N5-C6-C7-C2     | 1.3    | N5-C6-C7-C2     | -1.3   | N5-C6-C7-C2     | 1.4    |
| C1-N9-N10-C11   | 174.2  | C1-N9-N10-C11   | -174.3 | C1-N9-N10-C11   | 174.1  |
| N9-N10-C11-C16  | -179.6 | N10-C11-C16-C15 | 176.3  | N9-N10-C11-C16  | -179.3 |
| N10-C11-C16-C15 | -176.6 | N10-C11-C16-C17 | -3.7   | N10-C11-C16-C15 | -176.1 |
| N10-C11-C16-C17 | 3.5    | C24-N12-C13-C14 | -179.8 | N10-C11-C16-C17 | 4.1    |
| C24-N12-C13-C14 | -179.3 | C24-N12-C13-C18 | 0.7    | C24-N12-C13-C14 | -179.1 |
| C24-N12-C13-C18 | 0.8    | C25-N12-C13-C14 | -2.1   | C24-N12-C13-C18 | 0.9    |
| C25-N12-C13-C14 | -1.9   | C25-N12-C13-C18 | 178.4  | C25-N12-C13-C14 | -1.8   |
| C25-N12-C13-C18 | 178.2  | C13-N12-C24-C19 | -0.8   | C25-N12-C13-C18 | 178.2  |
| C13-N12-C24-C19 | -0.7   | C13-N12-C24-C23 | 179.6  | C13-N12-C24-C19 | -0.8   |
| C13-N12-C24-C23 | 179.6  | C25-N12-C24-C19 | -178.5 | C13-N12-C24-C23 | 179.5  |
| C25-N12-C24-C19 | -178.2 | C25-N12-C24-C23 | 1.8    | C25-N12-C24-C19 | -178.2 |
| C25-N12-C24-C23 | 2.1    | C13-N12-C25-C26 | -89.1  | C25-N12-C24-C23 | 2.1    |

|                 |        |                 |        |                  |        |
|-----------------|--------|-----------------|--------|------------------|--------|
| C13-N12-C25-C26 | -90.0  | C24-N12-C25-C26 | 88.2   | C13-N12-C25-C26  | -88.8  |
| C24-N12-C25-C26 | 87.1   | N12-C13-C14-C15 | -179.2 | C24-N12-C25-C26  | 88.1   |
| N12-C13-C14-C15 | -179.3 | C18-C13-C14-C15 | 0.2    | N12-C13-C14-C15  | -179.5 |
| C18-C13-C14-C15 | 0.5    | N12-C13-C18-C17 | 179.3  | C18-C13-C14-C15  | 0.5    |
| N12-C13-C18-C17 | 179.4  | N12-C13-C18-C19 | -0.4   | N12-C13-C18-C17  | 179.5  |
| N12-C13-C18-C19 | -0.5   | C14-C13-C18-C17 | -0.2   | N12-C13-C18-C19  | -0.6   |
| C14-C13-C18-C17 | -0.5   | C14-C13-C18-C19 | -179.9 | C14-C13-C18-C17  | -0.5   |
| C14-C13-C18-C19 | 179.6  | C13-C14-C15-C16 | -0.3   | C14-C13-C18-C19  | 179.4  |
| C13-C14-C15-C16 | -0.1   | C14-C15-C16-C11 | -179.6 | C13-C14-C15-C16  | 0.0    |
| C14-C15-C16-C11 | 179.8  | C14-C15-C16-C17 | 0.4    | C14-C15-C16-C11  | 179.9  |
| C14-C15-C16-C17 | -0.4   | C11-C16-C17-C18 | 179.7  | C14-C15-C16-C17  | -0.4   |
| C11-C16-C17-C18 | -179.7 | C15-C16-C17-C18 | -0.3   | C11-C16-C17-C18  | -179.9 |
| C15-C16-C17-C18 | 0.4    | C16-C17-C18-C13 | 0.2    | C15-C16-C17-C18  | 0.4    |
| C16-C17-C18-C13 | 0.0    | C16-C17-C18-C19 | 179.9  | C16-C17-C18-C13  | 0.1    |
| C16-C17-C18-C19 | 179.9  | C13-C18-C19-C20 | 179.8  | C16-C17-C18-C19  | -179.8 |
| C13-C18-C19-C20 | 179.9  | C13-C18-C19-C24 | -0.1   | C13-C18-C19-C20  | 180.0  |
| C13-C18-C19-C24 | 0.1    | C17-C18-C19-C20 | 0.1    | C13-C18-C19-C24  | 0.1    |
| C17-C18-C19-C20 | -0.1   | C17-C18-C19-C24 | -179.8 | C17-C18-C19-C20  | -0.1   |
| C17-C18-C19-C24 | -179.8 | C18-C19-C20-C21 | -180.0 | C17-C18-C19-C24  | -180.0 |
| C18-C19-C20-C21 | -179.8 | C24-C19-C20-C21 | -0.2   | C18-C19-C20-C21  | -180.0 |
| C24-C19-C20-C21 | -0.1   | C18-C19-C24-N12 | 0.5    | C24-C19-C20-C21  | -0.1   |
| C18-C19-C24-N12 | 0.4    | C18-C19-C24-C23 | -179.8 | C18-C19-C24-N12  | 0.4    |
| C18-C19-C24-C23 | -179.9 | C20-C19-C24-N12 | -179.4 | C18-C19-C24-C23  | -179.8 |
| C20-C19-C24-N12 | -179.4 | C20-C19-C24-C23 | 0.3    | C20-C19-C24-N12  | -179.5 |
| C20-C19-C24-C23 | 0.3    | C19-C20-C21-C22 | 0.0    | C20-C19-C24-C23  | 0.3    |
| C19-C20-C21-C22 | 0.0    | C20-C21-C22-C23 | 0.0    | C19-C20-C21-C22  | 0.0    |
| C20-C21-C22-C23 | 0.0    | C21-C22-C23-C24 | 0.2    | C19-C20-C21-Br50 | -179.9 |
| C21-C22-C23-C24 | 0.2    | C22-C23-C24-N12 | 179.3  | C20-C21-C22-C23  | 0.0    |
| C22-C23-C24-N12 | 179.3  | C22-C23-C24-C19 | -0.3   | Br50-C21-C22-C23 | 179.8  |
| C22-C23-C24-C19 | -0.3   | N12-C25-C26-C27 | -179.5 | C21-C22-C23-C24  | 0.2    |
| N12-C25-C26-C27 | -179.7 | C25-C26-C27-C28 | 180.0  | C22-C23-C24-N12  | 179.4  |
| C25-C26-C27-C28 | 179.6  | C26-C27-C28-C29 | -179.7 | C22-C23-C24-C19  | -0.3   |
|                 |        | C27-C28-C29-C30 | 179.9  | C25-C26-C27-C28  | 179.9  |

**Table S1b.** Cartesian coordinates of atoms obtained from geometry optimization of hydrazide integrated carbazole **6a-c**.

| <b>6a</b>               |        |        |        | <b>6b</b>               |        |        |        | <b>6c</b>               |        |        |        |
|-------------------------|--------|--------|--------|-------------------------|--------|--------|--------|-------------------------|--------|--------|--------|
| E = -1184.22657168 a.u. |        |        |        | E = -1262.87510908 a.u. |        |        |        | E = -3757.76795231 a.u. |        |        |        |
| Atom                    | X      | Y      | Z      | Atom                    | X      | Y      | Z      | Atom                    | X      | Y      | Z      |
| C                       | -5.140 | -1.684 | 0.168  | C                       | -5.740 | -1.925 | -0.005 | C                       | -5.529 | -1.998 | 0.270  |
| C                       | -5.310 | -0.191 | 0.166  | C                       | -5.961 | -0.514 | 0.461  | C                       | -5.556 | -0.501 | 0.150  |
| C                       | -4.570 | 0.707  | -0.607 | C                       | -5.083 | 0.222  | 1.259  | C                       | -4.769 | 0.250  | -0.725 |
| C                       | -4.909 | 2.058  | -0.563 | C                       | -5.474 | 1.491  | 1.683  | C                       | -4.974 | 1.627  | -0.789 |
| N                       | -5.893 | 2.559  | 0.188  | N                       | -6.638 | 2.062  | 1.360  | N                       | -5.871 | 2.284  | -0.048 |
| C                       | -6.599 | 1.690  | 0.920  | C                       | -7.473 | 1.347  | 0.599  | C                       | -6.621 | 1.554  | 0.784  |
| C                       | -6.359 | 0.320  | 0.933  | C                       | -7.192 | 0.065  | 0.141  | C                       | -6.515 | 0.174  | 0.909  |
| O                       | -6.081 | -2.427 | 0.391  | O                       | -6.677 | -2.683 | -0.196 | O                       | -6.530 | -2.630 | 0.564  |
| N                       | -3.905 | -2.241 | -0.097 | N                       | -4.458 | -2.392 | -0.213 | N                       | -4.357 | -2.688 | 0.028  |
| N                       | -2.725 | -1.566 | -0.147 | N                       | -3.333 | -1.628 | -0.258 | N                       | -3.121 | -2.132 | -0.074 |
| C                       | -1.660 | -2.265 | -0.295 | C                       | -2.240 | -2.220 | -0.573 | C                       | -2.126 | -2.933 | -0.186 |
| N                       | 3.436  | 0.081  | -0.544 | N                       | 2.646  | 0.525  | -0.933 | N                       | 3.159  | -1.075 | -0.594 |
| C                       | 2.268  | -0.659 | -0.504 | C                       | 1.541  | -0.305 | -0.872 | C                       | 1.929  | -1.702 | -0.510 |
| C                       | 2.075  | -2.033 | -0.669 | C                       | 1.453  | -1.688 | -1.047 | C                       | 1.610  | -3.059 | -0.604 |
| C                       | 0.778  | -2.520 | -0.593 | C                       | 0.200  | -2.276 | -0.947 | C                       | 0.276  | -3.420 | -0.493 |
| C                       | -0.327 | -1.674 | -0.355 | C                       | -0.961 | -1.523 | -0.671 | C                       | -0.746 | -2.468 | -0.290 |
| C                       | -0.119 | -0.299 | -0.182 | C                       | -0.859 | -0.135 | -0.498 | C                       | -0.413 | -1.111 | -0.188 |
| C                       | 1.170  | 0.213  | -0.254 | C                       | 0.384  | 0.477  | -0.594 | C                       | 0.917  | -0.724 | -0.296 |
| C                       | 1.724  | 1.545  | -0.128 | C                       | 0.834  | 1.849  | -0.476 | C                       | 1.593  | 0.555  | -0.236 |
| C                       | 1.170  | 2.804  | 0.112  | C                       | 0.187  | 3.060  | -0.221 | C                       | 1.149  | 1.866  | -0.050 |
| C                       | 2.008  | 3.911  | 0.171  | C                       | 0.936  | 4.229  | -0.173 | C                       | 2.094  | 2.882  | -0.049 |
| C                       | 3.392  | 3.770  | -0.006 | C                       | 2.323  | 4.198  | -0.377 | C                       | 3.459  | 2.626  | -0.227 |
| C                       | 3.970  | 2.527  | -0.246 | C                       | 2.993  | 3.005  | -0.634 | C                       | 3.913  | 1.324  | -0.412 |
| C                       | 3.124  | 1.419  | -0.308 | C                       | 2.236  | 1.833  | -0.684 | C                       | 2.973  | 0.293  | -0.419 |
| C                       | 4.775  | -0.452 | -0.740 | C                       | 4.018  | 0.098  | -1.164 | C                       | 4.443  | -1.738 | -0.773 |
| C                       | 5.488  | -0.830 | 0.565  | C                       | 4.782  | -0.252 | 0.121  | C                       | 5.120  | -2.144 | 0.543  |
| C                       | 6.898  | -1.381 | 0.326  | C                       | 6.225  | -0.685 | -0.155 | C                       | 6.467  | -2.838 | 0.319  |
| C                       | 7.623  | -1.752 | 1.622  | C                       | 7.007  | -1.038 | 1.115  | C                       | 7.155  | -3.246 | 1.625  |
| H                       | -3.754 | 0.371  | -1.229 | C                       | 8.454  | -1.466 | 0.847  | H                       | -4.019 | -0.216 | -1.346 |
| H                       | -4.355 | 2.774  | -1.164 | C                       | 9.226  | -1.815 | 2.122  | H                       | -4.383 | 2.232  | -1.471 |
| H                       | -7.400 | 2.110  | 1.521  | H                       | -4.122 | -0.174 | 1.548  | H                       | -7.349 | 2.102  | 1.376  |
| H                       | -6.973 | -0.352 | 1.518  | H                       | -4.814 | 2.079  | 2.314  | H                       | -7.164 | -0.382 | 1.573  |

|   |        |        |        |   |        |        |        |    |        |        |        |
|---|--------|--------|--------|---|--------|--------|--------|----|--------|--------|--------|
| H | -3.908 | -3.261 | -0.080 | H | -8.418 | 1.822  | 0.349  | H  | -4.454 | -3.699 | 0.120  |
| H | -1.716 | -3.358 | -0.382 | H | -7.909 | -0.492 | -0.448 | H  | -2.281 | -4.019 | -0.206 |
| H | 2.903  | -2.707 | -0.847 | H | -4.424 | -3.365 | -0.517 | H  | 2.372  | -3.814 | -0.755 |
| H | 0.607  | -3.584 | -0.720 | H | -2.228 | -3.296 | -0.788 | H  | 0.008  | -4.470 | -0.564 |
| H | -0.967 | 0.345  | 0.014  | H | 2.327  | -2.293 | -1.252 | H  | -1.197 | -0.383 | -0.018 |
| H | 0.100  | 2.917  | 0.251  | H | 0.110  | -3.349 | -1.079 | H  | 0.099  | 2.088  | 0.092  |
| H | 1.591  | 4.894  | 0.359  | H | -1.754 | 0.442  | -0.298 | H  | 4.164  | 3.447  | -0.217 |
| H | 4.028  | 4.647  | 0.047  | H | -0.885 | 3.088  | -0.062 | H  | 4.971  | 1.135  | -0.542 |
| H | 5.041  | 2.434  | -0.375 | H | 0.447  | 5.176  | 0.025  | H  | 4.282  | -2.617 | -1.404 |
| H | 4.699  | -1.323 | -1.397 | H | 2.889  | 5.121  | -0.333 | H  | 5.091  | -1.067 | -1.343 |
| H | 5.358  | 0.294  | -1.289 | H | 4.065  | 2.997  | -0.784 | H  | 5.260  | -1.251 | 1.163  |
| H | 5.540  | 0.053  | 1.212  | H | 4.532  | 0.897  | -1.706 | H  | 4.448  | -2.806 | 1.101  |
| H | 4.884  | -1.571 | 1.100  | H | 3.994  | -0.763 | -1.838 | H  | 6.319  | -3.726 | -0.308 |
| H | 6.839  | -2.263 | -0.324 | H | 4.246  | -1.049 | 0.647  | H  | 7.129  | -2.172 | -0.249 |
| H | 7.490  | -0.639 | -0.223 | H | 4.775  | 0.618  | 0.786  | H  | 8.112  | -3.737 | 1.432  |
| H | 8.625  | -2.140 | 1.420  | H | 6.751  | 0.116  | -0.691 | H  | 7.349  | -2.376 | 2.258  |
| H | 7.729  | -0.882 | 2.278  | H | 6.225  | -1.551 | -0.830 | H  | 6.534  | -3.941 | 2.198  |
| H | 7.075  | -2.519 | 2.177  | H | 6.485  | -1.842 | 1.650  | Br | 1.520  | 4.697  | 0.208  |
|   |        |        |        | H | 7.005  | -0.174 | 1.792  |    |        |        |        |
|   |        |        |        | H | 8.975  | -0.662 | 0.313  |    |        |        |        |
|   |        |        |        | H | 8.455  | -2.330 | 0.171  |    |        |        |        |
|   |        |        |        | H | 10.253 | -2.114 | 1.897  |    |        |        |        |
|   |        |        |        | H | 8.750  | -2.641 | 2.659  |    |        |        |        |
|   |        |        |        | H | 9.271  | -0.960 | 2.804  |    |        |        |        |

---

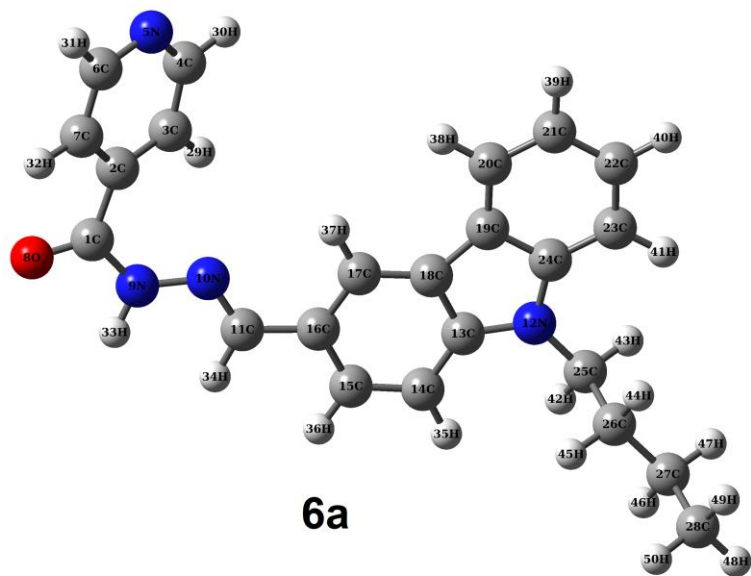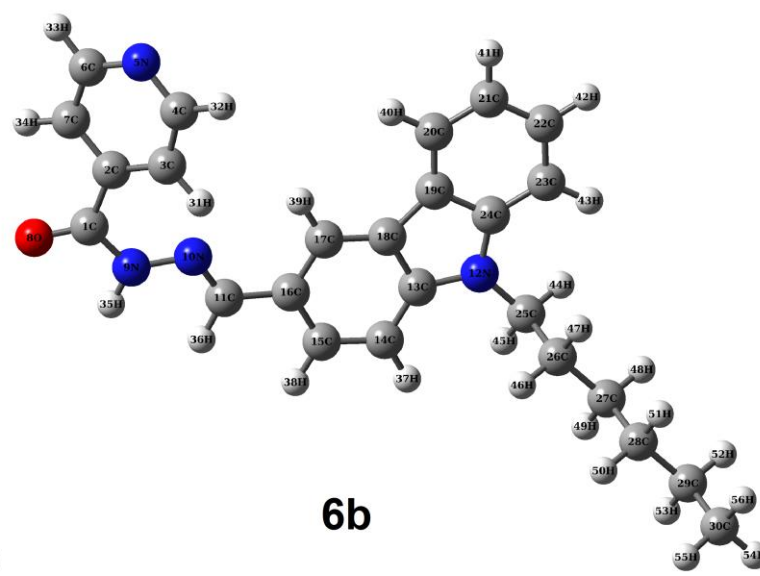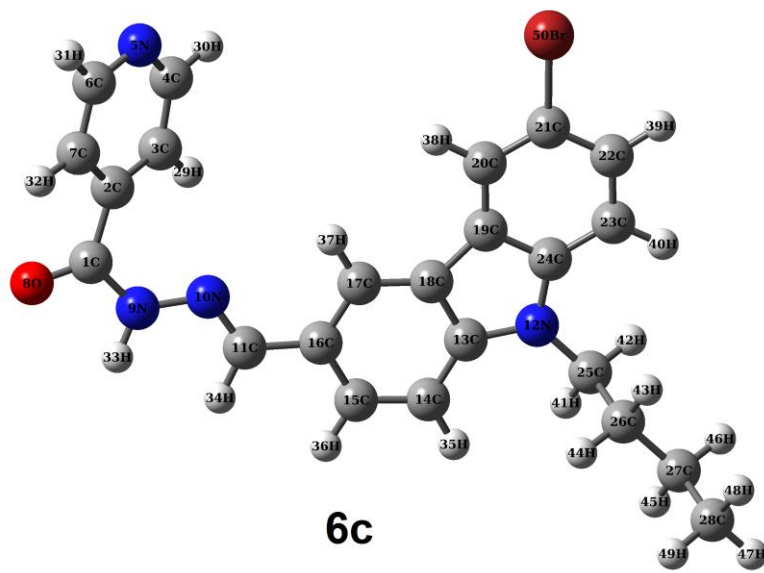

**Table S2.** Experimental and calculated vibrational frequencies along with their proposed assignment of hydrazide **6a**

| Mode | Expt. Freq. | Calc. Freq. |        |          | Vibrational Assignment with PED (%)                                                           |
|------|-------------|-------------|--------|----------|-----------------------------------------------------------------------------------------------|
|      |             | Unscaled    | Scaled | $I_{IR}$ |                                                                                               |
| 1    |             | 12          | 12     | 0.15     | $\tau$ C15C16C11N10 (47); $\tau$ C1N9N10C11 (28)                                              |
| 2    |             | 21          | 20     | 2.11     | $\beta$ C16C11N10 (14); $\beta$ C11N10N9 (11); $\tau$ C13N12C25C26 (17); $\beta$ C1N9N10 (10) |
| 3    |             | 24          | 23     | 1.78     | $\beta$ C1N9N10 (11); $\tau$ C2C1N9N10 (10)                                                   |
| 4    |             | 30          | 29     | 0.81     | $\tau$ C13N12C25C26 (14); $\tau$ C2C1N9N10 (12); $\Gamma$ C25C13C24N12 (13)                   |
| 5    |             | 41          | 40     | 1.03     | $\Gamma$ C25C13C24N12 (24); $\tau$ C7C2C1N9 (27)                                              |
| 6    |             | 59          | 57     | 1.9      | $\Gamma$ C25C13C24N12 (22); $\tau$ C7C2C1N9 (22)                                              |
| 7    |             | 74          | 72     | 0.62     | $\tau$ C27C26C25N12 (59); $\tau$ C25C26C27C28 (11)                                            |
| 8    |             | 88          | 85     | 3.11     | $\tau$ C2C1N9N10 (12)                                                                         |
| 9    |             | 105         | 102    | 5.65     | $\tau$ C7C2C1N9 (15)                                                                          |
| 10   |             | 113         | 110    | 2.6      | $\tau$ C1N9N10C11 (17); $\Gamma$ C18C19C24C20 (20)                                            |
| 11   |             | 115         | 112    | 0.36     | $\tau$ C27C26C25N12 (10); $\tau$ C25C26C27C28 (53)                                            |
| 12   |             | 158         | 153    | 3.49     | $\Gamma$ C1C2C7C3 (25); $\tau$ C7C4C6N5 (12)                                                  |
| 13   |             | 163         | 158    | 3.42     | $\tau$ C19C24C22C23 (24)                                                                      |
| 14   |             | 179         | 174    | 6.2      | $\beta$ C25C26C27 (23); $\beta$ C26C27C28 (12)                                                |
| 15   |             | 197         | 191    | 2.31     | $\beta$ C1C2C7 (16)                                                                           |
| 16   |             | 220         | 213    | 10.08    | $\beta$ C11C16C17 (10); $\tau$ C13C18C16C17 (20)                                              |
| 17   |             | 233         | 226    | 8.81     | $\tau$ C2C7N5C6 (16); $\tau$ C4C3N5C6 (30)                                                    |
| 18   |             | 245         | 238    | 5.23     | $\tau$ H49C28C27C26 (15); $\tau$ H50C28C27C26 (17); $\tau$ H48C28C27C26 (32)                  |
| 19   |             | 252         | 244    | 11.5     | $\beta$ C1C2C7 (27); $\tau$ C1N9N10C11 (10); $\tau$ C2C1N9N10 (15)                            |
| 20   |             | 278         | 270    | 7.55     | $\tau$ C19C24C22C23 (10); $\tau$ C16C11N10N9 (10)                                             |
| 21   |             | 291         | 282    | 5.6      | $\tau$ C16C11N10N9 (15); $\beta$ C24N12C25 (11); $\tau$ C22C21C23C24 (11)                     |
| 22   |             | 301         | 292    | 7.38     | $\beta$ C24N12C25 (27)                                                                        |
| 23   |             | 336         | 326    | 2.58     | $\tau$ C15C14C16C17 (10); $\beta$ C26C27C28 (11)                                              |
| 24   |             | 367         | 356    | 9.55     | $\beta$ N9C1O8 (15); $\beta$ C4N5C6 (12); $\nu$ C1C2 (23)                                     |
| 25   |             | 391         | 379    | 2.23     | $\tau$ H29C3C4N5 (10); $\tau$ H32C7C6N5 (10); $\tau$ C7C4C6N5 (16)                            |
| 26   |             | 398         | 386    | 5.3      | $\beta$ C26C27C28 (18); $\tau$ C17C18C19C24 (17)                                              |

|    |     |     |     |       |                                                                                                                                        |
|----|-----|-----|-----|-------|----------------------------------------------------------------------------------------------------------------------------------------|
| 27 |     | 413 | 401 | 11.42 | $\beta$ C2C1N9 (11); $\beta$ C16C17C18 (12); $\tau$ C7C4C6N5 (11)                                                                      |
| 28 |     | 434 | 421 | 8.19  | $\Gamma$ C18C19C24C20 (10); $\tau$ C13C18C16C17 (17); $\tau$ C22C21C23C24 (16); $\tau$ C13C18C14C15 (10)                               |
| 29 | 426 | 440 | 427 | 7.22  | $\beta$ C26C25N12 (20); $\beta$ C26C27C28 (20); $\tau$ C17C18C19C24 (10)                                                               |
| 30 |     | 457 | 443 | 11.84 | $\tau$ C13C18C14C15 (19)                                                                                                               |
| 31 |     | 461 | 447 | 13.47 | $\tau$ C13C18C14C15 (10)                                                                                                               |
| 32 |     | 494 | 479 | 24.34 | $\beta$ C16C11N10 (10)                                                                                                                 |
| 33 |     | 531 | 515 | 17.3  | $\beta$ C17C18C19 (14)                                                                                                                 |
| 34 |     | 578 | 561 | 8.33  | $\tau$ C22C21C23C24 (17); $\tau$ C21C20C22C23 (33); $\Gamma$ N12C19C23C24 (12)                                                         |
| 35 |     | 591 | 573 | 20.46 | $\beta$ N9C1O8 (12)                                                                                                                    |
| 36 |     | 615 | 597 | 19.74 | $\tau$ H33N9N10C11 (43)                                                                                                                |
| 37 |     | 620 | 601 | 8.98  | $\tau$ H33N9N10C11 (17); $\Gamma$ C11C15C17C16 (11)                                                                                    |
| 38 | 611 | 629 | 610 | 19.29 | $\tau$ C15C14C16C17 (13); $\Gamma$ C11C15C17C16 (20)                                                                                   |
| 39 |     | 641 | 622 | 8.47  | $\tau$ H33N9N10C11 (11); $\beta$ C16C17C18 (16); $\beta$ C21C22C23 (12); $\beta$ C14C15C16 (15)                                        |
| 40 |     | 652 | 632 | 28    | $\beta$ C14C13C18 (16)                                                                                                                 |
| 41 |     | 678 | 658 | 7.49  | $\beta$ C1N9N10 (10); $\beta$ C7C6N5 (11)                                                                                              |
| 42 | 680 | 686 | 665 | 4.53  | $\beta$ C3C4N5 (26); $\beta$ C7C6N5 (13)                                                                                               |
| 43 |     | 725 | 703 | 29.36 | $\tau$ C2C7N5C6 (21); $\tau$ C4C3N5C6 (11); $\Gamma$ O8C2N9C1 (34)                                                                     |
| 44 |     | 740 | 718 | 5.55  | $\tau$ H44C26C27C28 (19); $\tau$ H46C27C26C25 (20); $\beta$ H44C26C27 (15); $\beta$ H46C27C28 (12)                                     |
| 45 |     | 743 | 721 | 16.14 | $\tau$ H39C21C22C23 (10)                                                                                                               |
| 46 |     | 747 | 725 | 19.33 | $\tau$ H39C21C22C23 (10)                                                                                                               |
| 47 |     | 749 | 727 | 4.84  | $\nu$ C13C18 (10)                                                                                                                      |
| 48 |     | 764 | 741 | 20.72 | $\Gamma$ N12C19C23C24 (24); $\tau$ H40C22C23C24 (11); $\tau$ H38C20C21C22 (10)                                                         |
| 49 | 748 | 773 | 750 | 19.47 | $\tau$ C7C4C6N5 (10); $\tau$ C2C7N5C6 (28); $\tau$ C4C3N5C6 (13); $\Gamma$ O8C2N9C1 (15); $\tau$ H29C3C4N5 (14); $\tau$ H32C7C6N5 (14) |
| 50 |     | 782 | 759 | 4.07  | $\Gamma$ C19C13C17C18 (19);                                                                                                            |
| 51 |     | 794 | 770 | 4.79  | $\tau$ H46C27C26C25 (10); $\tau$ H45C26C27C28 (11); $\tau$ H48C28C27C26 (15)                                                           |
| 52 |     | 803 | 779 | 7.99  | $\beta$ C14C15C16 (11); $\beta$ C11N10N9 (12); $\nu$ C1C2 (10)                                                                         |
| 53 | 798 | 812 | 788 | 22.31 | $\tau$ C13C18C14C15 (12); $\tau$ H35C14C15C16 (39); $\tau$ H36C15C16C11 (31)                                                           |
| 54 |     | 858 | 832 | 1.55  | $\tau$ H41C23C24N12 (42); $\tau$ H38C20C21C22 (19);                                                                                    |



|    |     |      |      |       |                                                                                                    |
|----|-----|------|------|-------|----------------------------------------------------------------------------------------------------|
|    |     |      |      |       | $\tau$ H39C21C22C23 (17)                                                                           |
| 55 |     | 864  | 838  | 19.96 | $\Gamma$ O8C2N9C1 (19); $\Gamma$ C1C2C7C3 (18);<br>$\tau$ H29C3C4N5 (18)                           |
| 56 | 842 | 880  | 854  | 10.72 | $\tau$ H42C25N12C13 (10)                                                                           |
| 57 |     | 900  | 873  | 7.74  | $\tau$ H29C3C4N5 (29); $\tau$ H31C6N5C4 (21);<br>$\tau$ H32C7C6N5 (38)                             |
| 58 |     | 911  | 884  | 6.14  | $\tau$ H49C28C27C26 (16); $\tau$ H50C28C27C26 (16);<br>$\nu$ C26C27 (26); $\nu$ C27C28 (16)        |
| 59 | 891 | 924  | 896  | 5.65  | $\tau$ C13C18C16C17 (11); $\tau$ H37C17C18C13 (58);<br>$\tau$ H34C11N10N9 (11)                     |
| 60 |     | 936  | 908  | 7.4   | $\tau$ H30C4N5C6 (19); $\tau$ H31C6N5C4 (11)                                                       |
| 61 |     | 937  | 909  | 10.64 | $\tau$ H35C14C15C16 (23); $\tau$ H37C17C18C13 (11);<br>$\nu$ C16C17 (17); $\tau$ H36C15C16C11 (36) |
| 62 |     | 940  | 912  | 1.5   | $\tau$ H38C20C21C22 (36); $\tau$ H39C21C22C23 (10);<br>$\tau$ H40C22C23C24 (20)                    |
| 63 | 931 | 961  | 932  | 2.24  | $\tau$ H48C28C27C26 (10); $\beta$ H46C27C28 (11);<br>$\beta$ H44C26C27 (19)                        |
| 64 |     | 969  | 940  | 14.18 | $\tau$ H36C15C16C11 (12); $\tau$ H34C11N10N9 (75)                                                  |
| 65 |     | 979  | 950  | 0.43  | $\tau$ H38C20C21C22 (12); $\tau$ H39C21C22C23 (34);<br>$\tau$ H40C22C23C24 (35)                    |
| 66 |     | 993  | 963  | 5.07  | $\tau$ H29C3C4N5 (24); $\tau$ C4C3N5C6 (10);<br>$\tau$ H30C4N5C6 (35); $\tau$ H32C7C6N5 (15)       |
| 67 | 975 | 1005 | 975  | 5.88  | $\nu$ C25C26 (49); $\nu$ C27C28 (30)                                                               |
| 68 |     | 1007 | 977  | 7.66  | $\tau$ H30C4N5C6 (18); $\tau$ H31C6N5C4 (36);<br>$\tau$ H32C7C6N5 (14)                             |
| 69 |     | 1013 | 983  | 8.11  | $\beta$ C4N5C6 (13); $\beta$ C3C4N5 (14); $\beta$ C7C6N5 (16);<br>$\nu$ N5C4 (15); $\nu$ N5C6 (17) |
| 70 |     | 1031 | 1000 | 5.09  | $\nu$ C21C22 (10)                                                                                  |
| 71 |     | 1046 | 1015 | 9.59  | $\beta$ H38C20C21 (12); $\nu$ C21C22 (29); $\beta$ H41C23C24<br>(12)                               |
| 72 |     | 1056 | 1024 | 2.21  | $\nu$ C25C26 (17); $\nu$ C27C28 (36); $\nu$ C26C27 (37)                                            |
| 73 |     | 1080 | 1048 | 12.37 | $\beta$ C22C23C24 (25); $\beta$ C20C21C22 (11); $\nu$ N12C25<br>(22)                               |
| 74 |     | 1094 | 1061 | 15.96 | $\beta$ C3C4N5 (19); $\beta$ C7C6N5 (25); $\beta$ H32C7C6 (17)                                     |
| 75 |     | 1111 | 1078 | 1.92  | $\beta$ H29C3C4 (22); $\beta$ H32C7C6 (15); $\nu$ C3C4 (23);<br>$\nu$ C6C7 (16)                    |
| 76 |     | 1128 | 1094 | 14.04 | $\tau$ H49C28C27C26 (15); $\tau$ H50C28C27C26 (15)                                                 |
| 77 |     | 1131 | 1097 | 15.81 | $\nu$ N9N10 (23); $\nu$ C2C7 (12)                                                                  |
| 78 |     | 1144 | 1110 | 17.79 | $\nu$ C20C21 (12); $\beta$ H39C21C22 (12)                                                          |
| 79 |     | 1162 | 1127 | 41.27 | $\nu$ C26C27 (15); $\beta$ C25C26C27 (10)                                                          |
| 80 |     | 1169 | 1134 | 33.68 | $\nu$ N9N10 (20)                                                                                   |

|     |      |      |      |       |                                                                              |
|-----|------|------|------|-------|------------------------------------------------------------------------------|
| 81  |      | 1178 | 1143 | 10.98 | $\beta$ H35C14C15 (11); vN9N10 (10); $\beta$ H36C15C16 (23); vC14C15 (13)    |
| 82  | 1147 | 1181 | 1146 | 4.77  | $\beta$ H40C22C23 (32); $\beta$ H39C21C22 (16); $\beta$ H41C23C24 (12)       |
| 83  |      | 1216 | 1180 | 28.37 | vC11C16 (20); $\beta$ H37C17C18 (10)                                         |
| 84  |      | 1237 | 1200 | 33.93 | $\beta$ H42C25C26 (13); $\beta$ H44C26C27 (11)                               |
| 85  |      | 1244 | 1207 | 11.57 | $\beta$ H30C4N5 (23); vN5C4 (10); vN5C6 (12); $\beta$ H31C6N5 (21)           |
| 86  | 1211 | 1250 | 1213 | 28.63 | $\beta$ H37C17C18 (12)                                                       |
| 87  |      | 1273 | 1235 | 28.34 | $\beta$ H44C26C27 (11)                                                       |
| 88  | 1240 | 1274 | 1236 | 8.44  | vN5C4 (27); vN5C6 (24); vC2C3 (15); vC6C7 (10); vC2C7 (12)                   |
| 89  |      | 1294 | 1255 | 9.13  | $\tau$ H44C26C27C28 (20); $\tau$ H45C26C27C28 (24)                           |
| 90  |      | 1303 | 1264 | 31.79 | $\beta$ H36C15C16 (14); $\beta$ H37C17C18 (23); $\beta$ H34C11N10 (12)       |
| 91  | 1278 | 1321 | 1281 | 15.38 | $\beta$ H42C25C26 (19); $\beta$ H46C27C28 (27)                               |
| 92  |      | 1332 | 1292 | 7.12  | $\beta$ H44C26C27 (33); $\beta$ H46C27C28 (19)                               |
| 93  | 1298 | 1344 | 1304 | 76.05 | vN9C1 (20); vC1C2 (11); $\beta$ H29C3C4 (14)                                 |
| 94  |      | 1353 | 1312 | 23.96 | $\beta$ H29C3C4 (10); $\beta$ H32C7C6 (10)                                   |
| 95  |      | 1358 | 1317 | 54.2  | $\beta$ H32C7C6 (11); $\beta$ H31C6N5 (13)                                   |
| 96  | 1328 | 1367 | 1326 | 20.48 | vC23C24 (10)                                                                 |
| 97  |      | 1376 | 1335 | 47.66 | vN12C25 (19); vN12C13 (16); vN12C24 (14)                                     |
| 98  |      | 1384 | 1342 | 3.79  | $\tau$ H46C27C26C25 (13); $\tau$ H47C27C26C25 (25); $\tau$ H43C25N12C13 (10) |
| 99  | 1352 | 1390 | 1348 | 38.64 | $\beta$ H34C11N10 (38); $\beta$ H33N9N10 (22)                                |
| 100 |      | 1407 | 1365 | 15.18 | $\tau$ H42C25N12C13 (13); $\tau$ H43C25N12C13 (18); $\beta$ H42C25H43 (11)   |
| 101 |      | 1418 | 1375 | 22.54 | vN12C13 (11); vN12C24 (10); $\beta$ H42C25C26 (16)                           |
| 102 | 1381 | 1420 | 1377 | 7.72  | $\beta$ H48C28H50 (29); $\beta$ H48C28H49 (28); $\beta$ H49C28H50 (24)       |
| 103 | 1408 | 1439 | 1396 | 21.74 | vC6C7 (14); vC3C4 (14); $\beta$ H30C4N5 (28); $\beta$ H31C6N5 (23)           |
| 104 |      | 1470 | 1426 | 20.92 | vC14C15 (17); vC17C18 (14); $\beta$ H38C20C21 (10); $\beta$ H41C23C24 (12)   |
| 105 | 1438 | 1488 | 1443 | 34.18 | $\tau$ H44C26C27C28 (10); $\tau$ H45C26C27C28 (12)                           |
| 106 |      | 1492 | 1447 | 8.45  | $\beta$ H46C27H47 (55); $\beta$ H44C26H45 (18)                               |
| 107 |      | 1497 | 1452 | 25.64 | $\beta$ H44C26H45 (38); $\beta$ H49C28H50 (13); $\beta$ H42C25H43 (10)       |
| 108 |      | 1503 | 1458 | 11.97 | $\beta$ H48C28H50 (38); $\beta$ H48C28H49 (38); $\tau$ H48C28C27C26 (14)     |

|     |      |      |      |       |                                                                           |
|-----|------|------|------|-------|---------------------------------------------------------------------------|
| 109 |      | 1505 | 1460 | 30.83 | $\beta$ H33N9N10 (26)                                                     |
| 110 | 1465 | 1507 | 1462 | 7.53  | $\beta$ H49C28H50 (26); $\beta$ H42C25H43 (27);                           |
| 111 |      | 1517 | 1471 | 14.3  | $\beta$ H42C25H43 (21); $\beta$ H44C26H45 (22);<br>$\beta$ H46C27H47 (25) |
| 112 |      | 1518 | 1472 | 29.89 | vC22C23 (10); $\beta$ H39C21C22 (11)                                      |
| 113 |      | 1521 | 1475 | 20.77 | $\beta$ H30C4N5 (11); $\beta$ H31C6N5 (12)                                |
| 114 | 1489 | 1525 | 1479 | 20.03 | $\beta$ H33N9N10 (12)                                                     |
| 115 |      | 1594 | 1546 | 22.69 | vN5C4 (15); vN5C6 (16); vC2C3 (24); vC2C7<br>(24)                         |
| 116 | 1554 | 1606 | 1558 | 12.65 | vC13C14 (25); vC15C16 (10); vC13C18 (17)                                  |
| 117 |      | 1617 | 1568 | 3.89  | vC21C22 (19); vC19C24 (20); vC19C20 (11)                                  |
| 118 |      | 1633 | 1584 | 24.36 | vC6C7 (16); vC2C7 (10); vC3C4 (14);                                       |
| 119 |      | 1635 | 1586 | 40.49 | vC17C18 (13)                                                              |
| 120 |      | 1657 | 1607 | 26.92 | vC19C20 (14); vC23C24 (11); vN10C11 (18)                                  |
| 121 | 1587 | 1674 | 1624 | 14.98 | vN10C11 (70)                                                              |
| 122 | 1641 | 1741 | 1689 | 100   | vO8C1 (88)                                                                |
| 123 | 2868 | 3005 | 3035 | 18.33 | vC27H46 (47); vC27H47 (47)                                                |
| 124 | 2953 | 3019 | 3049 | 33.57 | vC11H34 (100)                                                             |
| 125 |      | 3022 | 3052 | 12.54 | vC26H44 (22); vC26H45 (29); vC28H48 (10);<br>vC28H49 (17); vC28H50 (16)   |
| 126 |      | 3026 | 3056 | 23.39 | vC26H45 (24); vC28H48 (15); vC26H44 (11);<br>vC28H49 (17); vC28H50 (23)   |
| 127 |      | 3028 | 3058 | 11.42 | vC27H46 (36); vC27H47 (42); vC26H44 (14)                                  |
| 128 | 3070 | 3044 | 3074 | 31.61 | vC25H43 (50); vC25H42 (41)                                                |
| 129 |      | 3056 | 3087 | 9.41  | vC26H44 (35); vC26H45 (30); vC25H42 (12)                                  |
| 130 |      | 3083 | 3114 | 3.08  | vC25H42 (26); vC25H43 (22); vC28H49 (22);<br>vC28H50 (22)                 |
| 131 |      | 3088 | 3119 | 34.31 | vC25H42 (16); vC25H43 (14); vC28H49 (22);<br>vC28H50 (25)                 |
| 132 |      | 3092 | 3123 | 27.54 | vC28H48 (73); vC28H49 (15); vC28H50 (10)                                  |
| 133 |      | 3147 | 3178 | 21.87 | vC4H30 (85); vC6H31 (13)                                                  |
| 134 |      | 3152 | 3184 | 17.91 | vC4H30 (13); vC6H31 (84)                                                  |
| 135 |      | 3163 | 3195 | 12.64 | vC14H35 (10); vC15H36 (90)                                                |
| 136 |      | 3166 | 3198 | 2.78  | vC20H38 (20); vC21H39 (30); vC22H40 (41);<br>vC23H41 (10)                 |
| 137 |      | 3174 | 3206 | 8.88  | vC20H38 (53); vC22H40 (26); vC23H41 (16)                                  |
| 138 |      | 3185 | 3217 | 19.38 | vC20H38 (17); vC21H39 (25); vC23H41 (52)                                  |
| 139 | 3221 | 3190 | 3222 | 18.61 | vC14H35 (86); vC15H36 (10)                                                |
| 140 |      | 3193 | 3225 | 8.39  | vC17H37 (96)                                                              |

|     |      |      |      |       |                                                         |
|-----|------|------|------|-------|---------------------------------------------------------|
| 141 |      | 3194 | 3226 | 16.4  | $\nu$ C21H39 (30); $\nu$ C22H40 (21); $\nu$ C23H41 (15) |
| 142 |      | 3208 | 3240 | 7.9   | $\nu$ C7H32 (98)                                        |
| 143 |      | 3231 | 3263 | 5.04  | $\nu$ C3H29 (99)                                        |
| 144 | 3405 | 3464 | 3499 | 10.27 | $\nu$ N9H33 (100)                                       |

---

$\nu$  - stretching,  $\beta$  - in-plane bending,  $\tau$  - torsional vibrations,  $\Gamma$  - out of plane bending

**Table S3.** Experimental and calculated vibrational frequencies along with their proposed assignment of hydrazide **6b**

| Mode | Expt. Freq | Calc. Freq. |        |          | Vibrational Assignment with PED (%)                                                                |
|------|------------|-------------|--------|----------|----------------------------------------------------------------------------------------------------|
|      |            | Unscaled    | Scaled | $I_{IR}$ |                                                                                                    |
| 1    |            | 10          | 10     | 0.93     | $\tau$ C15C16C11N10 (44); $\tau$ C1N9N10C11 (20); $\Gamma$ C25C13C24N12 (15)                       |
| 2    |            | 17          | 16     | 1.72     | $\tau$ C13N12C25C26 (25); $\tau$ C27C26C25N12 (25)                                                 |
| 3    |            | 23          | 22     | 2.09     | $\beta$ C16C11N10 (14); $\beta$ C1N9N10 (15); $\beta$ C11N10N9 (12)                                |
| 4    |            | 25          | 24     | 1.33     | $\tau$ C16C11N10N9 (10); $\Gamma$ C25C13C24N12 (21); $\tau$ C2C1N9N10 (15)                         |
| 5    |            | 38          | 37     | 0.87     | $\Gamma$ C25C13C24N12 (18)                                                                         |
| 6    |            | 53          | 51     | 0.62     | $\tau$ C27C26C25N12 (29); $\tau$ C25C26C27C28 (12); $\tau$ C26C27C28C29 (19)                       |
| 7    |            | 55          | 53     | 1.11     | $\tau$ C7C2C1N9 (32)                                                                               |
| 8    |            | 73          | 71     | 0.45     | $\tau$ C25C26C27C28 (30); $\tau$ C26C27C28C29 (16); $\tau$ C27C28C29C30 (24)                       |
| 9    |            | 87          | 84     | 3.48     | $\beta$ C11C16C17 (10); $\tau$ C1N9N10C11 (13); $\tau$ C2C1N9N10 (13)                              |
| 10   |            | 102         | 99     | 4.07     | $\Gamma$ C25C13C24N12 (10); $\beta$ C26C27C28 (13); $\beta$ C25C26C27 (10); $\beta$ C27C28C29 (12) |
| 11   |            | 104         | 101    | 4.29     | $\Gamma$ C19C13C17C18 (12); $\Gamma$ N12C19C23C24 (10); $\Gamma$ C18C19C24C20 (18)                 |
| 12   |            | 118         | 114    | 2.49     | $\Gamma$ C18C19C24C20 (12); $\tau$ C1N9N10C11 (16)                                                 |
| 13   |            | 134         | 130    | 0.38     | $\tau$ C27C26C25N12 (26); $\tau$ C26C27C28C29 (30)                                                 |
| 14   |            | 147         | 143    | 1.45     | $\tau$ C25C26C27C28 (24); $\tau$ C27C28C29C30 (29)                                                 |
| 15   |            | 157         | 152    | 4.93     | $\Gamma$ C1C2C7C3 (17)                                                                             |
| 16   |            | 168         | 163    | 3.54     | $\tau$ C15C16C11N10 (17); $\tau$ C1N9N10C11 (10); $\tau$ C17C18C19C24 (12); $\beta$ C1C2C7 (10)    |
| 17   |            | 174         | 169    | 2.5      | $\tau$ C19C24C22C23 (14)                                                                           |
| 18   |            | 217         | 210    | 8.63     | $\beta$ C1C2C7 (19)                                                                                |
| 19   |            | 232         | 225    | 9.65     | $\tau$ C7C2C1N9 (13); $\tau$ C2C1N9N10 (13)                                                        |
| 20   |            | 236         | 229    | 10.5     | $\tau$ C22C21C23C24 (15); $\tau$ C13C18C14C15 (11)                                                 |
| 21   |            | 249         | 242    | 3.39     | $\tau$ H54C30C29C28 (33); $\tau$ H55C30C29C28 (23)                                                 |
| 22   |            | 251         | 243    | 6.71     | $\beta$ C25C26C27 (11); $\beta$ C28C29C30 (12); $\tau$ C2C1N9N10 (10)                              |
| 23   |            | 270         | 262    | 6.73     | $\beta$ C1C2C7 (14)                                                                                |
| 24   |            | 292         | 283    | 9.23     | $\tau$ C16C11N10N9 (22); $\tau$ C2C1N9N10 (10)                                                     |
| 25   |            | 297         | 288    | 6.44     | $\beta$ C24N12C25 (36)                                                                             |

|    |     |     |     |       |                                                                                                         |
|----|-----|-----|-----|-------|---------------------------------------------------------------------------------------------------------|
| 26 |     | 321 | 311 | 3.86  | $\beta$ C27C28C29 (10); $\tau$ C15C14C16C17 (15)                                                        |
| 27 |     | 367 | 356 | 9.05  | $\nu$ C1C2 (23); $\beta$ N9C1O8 (15); $\beta$ C4N5C6 (12)                                               |
| 28 |     | 391 | 379 | 1.89  | $\tau$ H31C3C4N5 (10); $\tau$ H34C7C6N5 (10);<br>$\tau$ C4C3N5C6 (31)                                   |
| 29 |     | 403 | 391 | 3.15  | $\tau$ C17C18C19C24 (19)                                                                                |
| 30 |     | 412 | 400 | 11.34 | $\beta$ C2C1N9 (11); $\beta$ C16C17C18 (12); $\tau$ C7C4C6N5 (11)                                       |
| 31 |     | 435 | 422 | 8.68  | $\Gamma$ C18C19C24C20 (13); $\tau$ C13C18C16C17 (17)                                                    |
| 32 |     | 436 | 423 | 3.97  | $\beta$ C25C26C27 (10); $\beta$ C27C28C29 (14);<br>$\beta$ C28C29C30 (36)                               |
| 33 |     | 448 | 435 | 9.74  | $\beta$ C26C27C28 (14); $\beta$ C26C25N12 (14)                                                          |
| 34 |     | 458 | 444 | 7.91  | $\tau$ C13C18C14C15 (20)                                                                                |
| 35 |     | 466 | 452 | 12.61 | $\beta$ C26C25N12 (10)                                                                                  |
| 36 |     | 495 | 480 | 26.15 | $\beta$ C16C11N10 (10)                                                                                  |
| 37 | 522 | 532 | 516 | 17.24 | $\beta$ C17C18C19 (14)                                                                                  |
| 38 |     | 578 | 561 | 5.09  | $\tau$ C22C21C23C24 (18); $\tau$ C21C20C22C23 (33);<br>$\Gamma$ N12C19C23C24 (12)                       |
| 39 |     | 592 | 574 | 22.07 | $\beta$ N9C1O8 (12)                                                                                     |
| 40 |     | 614 | 596 | 16.93 | $\tau$ H35N9N10C11 (49)                                                                                 |
| 41 |     | 625 | 606 | 19.96 | $\tau$ H35N9N10C11 (19); $\beta$ C21C22C23 (10)                                                         |
| 42 | 611 | 629 | 610 | 12.58 | $\tau$ C15C14C16C17 (13); $\Gamma$ C11C15C17C16 (12);<br>$\tau$ H38C15C16C17 (10)                       |
| 43 |     | 641 | 622 | 7.61  | $\beta$ C16C17C18 (17); $\beta$ C21C22C23 (14);<br>$\beta$ C14C15C16 (16)                               |
| 44 |     | 655 | 635 | 26.67 | $\beta$ C14C13C18 (17)                                                                                  |
| 45 |     | 678 | 658 | 7.31  | $\beta$ C1N9N10 (10); $\beta$ C7C6N5 (11)                                                               |
| 46 | 688 | 686 | 665 | 4.32  | $\beta$ C3C4N5 (25); $\beta$ C7C6N5 (13)                                                                |
| 47 |     | 725 | 703 | 28.93 | $\tau$ C2C7N5C6 (21); $\tau$ C4C3N5C6 (10);<br>$\Gamma$ O8C2N9C1 (34)                                   |
| 48 |     | 734 | 712 | 7.74  | $\tau$ H52C29C28C27 (12); $\tau$ H50C28C29C30 (18);<br>$\tau$ H48C27C28C29 (16); $\beta$ H48C27C28 (10) |
| 49 |     | 744 | 722 | 18.7  | $\tau$ H41C21C22C23 (12)                                                                                |
| 50 |     | 746 | 724 | 7.42  | $\tau$ C7C4C6N5 (16); $\tau$ C2C7N5C6 (16)                                                              |
| 51 |     | 749 | 727 | 14.91 | $\tau$ H31C3C4N5 (14); $\tau$ H34C7C6N5 (14)                                                            |
| 52 |     | 751 | 728 | 3.57  | $\tau$ C13C18C16C17 (22); $\tau$ C22C21C23C24 (13)                                                      |
| 53 |     | 764 | 741 | 20.65 | $\tau$ C19C24C22C23 (11); $\Gamma$ N12C19C23C24 (24);<br>$\tau$ H42C22C23C24 (11)                       |
| 54 | 750 | 773 | 750 | 18.88 | $\tau$ C7C4C6N5 (10); $\tau$ C2C7N5C6 (27);<br>$\tau$ C4C3N5C6 (13); $\Gamma$ O8C2N9C1 (15)             |
| 55 |     | 782 | 759 | 3.99  | $\Gamma$ C19C13C17C18 (19); $\tau$ H37C14C15C16 (10);                                                   |

|    |     |      |      |       |                                                                                                           |
|----|-----|------|------|-------|-----------------------------------------------------------------------------------------------------------|
|    |     |      |      |       | $\tau$ H39C17C18C13 (10)                                                                                  |
| 56 |     | 796  | 772  | 8.59  | $\tau$ H54C30C29C28 (11); $\beta$ H48C27C28 (10)                                                          |
| 57 |     | 804  | 780  | 6.73  | $\beta$ C14C15C16 (11); $\beta$ C11N10N9 (12)                                                             |
| 58 | 798 | 812  | 788  | 22.47 | $\tau$ C13C18C14C15 (14); $\tau$ H37C14C15C16 (42);<br>$\tau$ H38C15C16C17 (26)                           |
| 59 |     | 858  | 832  | 1.31  | $\tau$ H40C20C21C22 (19); $\tau$ H41C21C22C23 (17);<br>$\tau$ H43C23C24N12 (41)                           |
| 60 |     | 863  | 837  | 20.18 | $\Gamma$ O8C2N9C1 (19); $\Gamma$ C1C2C7C3 (18);<br>$\tau$ H31C3C4N5 (18)                                  |
| 61 | 846 | 867  | 841  | 5.69  | $\tau$ H32C4N5C6 (18); $\tau$ H33C6N5C4 (11)                                                              |
| 62 |     | 899  | 872  | 5     | $\tau$ H55C30C29C28 (13); $\tau$ H56C30C29C28 (15);<br>$\nu$ C28C29 (30); $\nu$ C29C30 (17)               |
| 63 |     | 900  | 873  | 7.75  | $\tau$ H31C3C4N5 (28); $\tau$ H33C6N5C4 (22);<br>$\tau$ H34C7C6N5 (39)                                    |
| 64 | 891 | 919  | 891  | 5.76  | $\tau$ H42C22C23C24 (19); $\tau$ H43C23C24N12 (18)                                                        |
| 65 |     | 924  | 896  | 5.8   | $\tau$ C13C18C16C17 (10); $\tau$ H39C17C18C13 (54);<br>$\tau$ H36C11N10N9 (11)                            |
| 66 |     | 936  | 908  | 7.55  | $\tau$ H37C14C15C16 (20); $\tau$ H38C15C16C17 (37);<br>$\tau$ H39C17C18C13 (15)                           |
| 67 |     | 938  | 910  | 10.25 | $\nu$ C16C17 (17)                                                                                         |
| 68 |     | 940  | 912  | 2.19  | $\tau$ H40C20C21C22 (35); $\tau$ H41C21C22C23 (10)                                                        |
| 69 |     | 968  | 939  | 14.18 | $\tau$ H36C11N10N9 (76)                                                                                   |
| 70 |     | 979  | 950  | 0.21  | $\tau$ H40C20C21C22 (12); $\tau$ H41C21C22C23 (33);<br>$\tau$ H42C22C23C24 (36); $\tau$ H43C23C24N12 (10) |
| 71 |     | 993  | 963  | 4.92  | $\tau$ H31C3C4N5 (23); $\tau$ C4C3N5C6 (10);<br>$\tau$ H32C4N5C6 (35); $\tau$ H34C7C6N5 (15)              |
| 72 |     | 1001 | 971  | 3.89  | $\nu$ C25C26 (26); $\nu$ C27C28 (29); $\nu$ C29C30 (25)                                                   |
| 73 | 975 | 1007 | 977  | 7.68  | $\tau$ H32C4N5C6 (18); $\tau$ H33C6N5C4 (36);<br>$\tau$ H34C7C6N5 (13)                                    |
| 74 |     | 1011 | 981  | 3.86  | $\beta$ H48C27C28 (16); $\beta$ H50C28C29 (10);<br>$\tau$ H51C28C29C30 (11); $\beta$ H46C26C27 (14)       |
| 75 |     | 1013 | 983  | 8.01  | $\beta$ C4N5C6 (13); $\beta$ C3C4N5 (14); $\beta$ C7C6N5 (16);<br>$\nu$ N5C4 (15); $\nu$ N5C6 (16)        |
| 76 |     | 1031 | 1000 | 5.27  | $\nu$ C21C22 (10)                                                                                         |
| 77 |     | 1034 | 1003 | 6.35  | $\nu$ C25C26 (29); $\nu$ C26C27 (15)                                                                      |
| 78 |     | 1046 | 1015 | 9.36  | $\beta$ H40C20C21 (12); $\nu$ C21C22 (28); $\beta$ H43C23C24<br>(11)                                      |
| 79 |     | 1048 | 1017 | 2.55  | $\nu$ C26C27 (42); $\nu$ C29C30 (23)                                                                      |
| 80 |     | 1065 | 1033 | 2.93  | $\nu$ C27C28 (35); $\nu$ C29C30 (13); $\nu$ C28C29 (28)                                                   |
| 81 |     | 1080 | 1048 | 12.66 | $\beta$ C22C23C24 (24); $\beta$ C20C21C22 (11); $\nu$ N12C25<br>(21)                                      |

|     |      |      |      |       |                                                                                                        |
|-----|------|------|------|-------|--------------------------------------------------------------------------------------------------------|
| 82  | 1066 | 1094 | 1061 | 15.77 | $\beta$ C3C4N5 (19); $\beta$ C7C6N5 (25); $\beta$ H34C7C6 (17)                                         |
| 83  |      | 1111 | 1078 | 2.15  | $\beta$ H31C3C4 (22); $\beta$ H34C7C6 (15); vC3C4 (23); vC6C7 (16)                                     |
| 84  |      | 1131 | 1097 | 16.38 | vN9N10 (23); vC2C7 (12)                                                                                |
| 85  |      | 1136 | 1102 | 12.92 | $\tau$ H55C30C29C28 (11); $\tau$ H56C30C29C28 (12); vC28C29 (12)                                       |
| 86  |      | 1145 | 1111 | 17.17 | vC20C21 (12); $\beta$ H41C21C22 (12)                                                                   |
| 87  |      | 1162 | 1127 | 44.08 | $\beta$ H37C14C15 (11)                                                                                 |
| 88  |      | 1170 | 1135 | 28.53 | vN9N10 (19)                                                                                            |
| 89  | 1149 | 1178 | 1143 | 12.97 | vN9N10 (10); $\beta$ H37C14C15 (11); $\beta$ H38C15C16 (21); vC14C15 (12)                              |
| 90  |      | 1182 | 1147 | 5.66  | $\beta$ H41C21C22 (15); $\beta$ H42C22C23 (30); $\beta$ H43C23C24 (11)                                 |
| 91  |      | 1215 | 1179 | 27.19 | vC11C16 (20); $\beta$ H39C17C18 (10)                                                                   |
| 92  |      | 1223 | 1186 | 25.66 | $\beta$ H31C3C4 (10); $\beta$ H34C7C6 (11)                                                             |
| 93  |      | 1244 | 1207 | 12.39 | $\beta$ H32C4N5 (23); vN5C4 (10); vN5C6 (12); $\beta$ H33C6N5 (21)                                     |
| 94  | 1217 | 1248 | 1211 | 19.94 | vC19C24 (11); vC18C19 (10)                                                                             |
| 95  |      | 1259 | 1221 | 8.68  | $\beta$ H39C17C18 (16)                                                                                 |
| 96  |      | 1260 | 1222 | 49.77 | $\tau$ H47C26C27C28 (13); $\tau$ H48C27C28C29 (11); $\tau$ H51C28C29C30 (10); $\tau$ H49C27C28C29 (16) |
| 97  |      | 1274 | 1236 | 9.3   | vN5C4 (27); vN5C6 (24); vC2C3 (15); vC6C7 (10); vC2C7 (12)                                             |
| 98  | 1247 | 1290 | 1251 | 6.62  | $\beta$ H46C26C27 (13); $\beta$ H52C29C30 (14)                                                         |
| 99  |      | 1303 | 1264 | 30.39 | $\beta$ H38C15C16 (11); $\beta$ H39C17C18 (18); $\beta$ H36C11N10 (11)                                 |
| 100 | 1280 | 1325 | 1285 | 13.56 | $\beta$ H44C25C26 (19); $\beta$ H52C29C30 (13)                                                         |
| 101 |      | 1326 | 1286 | 3.2   | $\tau$ H46C26C27C28 (12)                                                                               |
| 102 |      | 1334 | 1294 | 7.22  | $\beta$ H48C27C28 (42); $\beta$ H46C26C27 (11); $\tau$ H49C27C28C29 (12)                               |
| 103 |      | 1339 | 1299 | 12.66 | $\beta$ H52C29C30 (20); $\beta$ H50C28C29 (23); $\beta$ H46C26C27 (14)                                 |
| 104 | 1303 | 1345 | 1305 | 76.32 | vN9C1 (20); vC1C2 (11)                                                                                 |
| 105 |      | 1354 | 1313 | 22.86 | $\beta$ H31C3C4 (14)                                                                                   |
| 106 |      | 1358 | 1317 | 53.77 | $\beta$ H34C7C6 (10); $\beta$ H33C6N5 (12)                                                             |
| 107 | 1327 | 1367 | 1326 | 20.1  | vC23C24 (10)                                                                                           |
| 108 |      | 1376 | 1335 | 48.68 | vN12C25 (19); vN12C13 (15); vN12C24 (13)                                                               |
| 109 |      | 1382 | 1341 | 3.31  | $\tau$ H53C29C28C27 (16); $\tau$ H49C27C28C29 (10)                                                     |
| 110 | 1354 | 1391 | 1349 | 39.58 | $\beta$ H36C11N10 (38); $\beta$ H35N9N10 (22)                                                          |
| 111 |      | 1405 | 1363 | 3.3   | $\tau$ H48C27C28C29 (11); $\tau$ H49C27C28C29 (14);                                                    |



|     |      |      |      |       |                                                                                                         |
|-----|------|------|------|-------|---------------------------------------------------------------------------------------------------------|
|     |      |      |      |       | $\tau$ H50C28C29C30 (16); $\tau$ H51C28C29C30 (18)                                                      |
| 112 |      | 1409 | 1367 | 15.13 | $\tau$ H44C25N12C13 (14); $\tau$ H45C25N12C13 (25);<br>$\tau$ H47C26C27C28 (10); $\beta$ H44C25H45 (14) |
| 113 |      | 1417 | 1374 | 21.4  | $\beta$ H44C25C26 (17); $\nu$ N12C13 (10); $\nu$ N12C24<br>(10)                                         |
| 114 |      | 1420 | 1377 | 6.39  | $\beta$ H54C30H56 (30); $\beta$ H54C30H55 (31);<br>$\beta$ H55C30H56 (27)                               |
| 115 | 1386 | 1439 | 1396 | 21.81 | $\beta$ H32C4N5 (28); $\beta$ H33C6N5 (22); $\nu$ C6C7 (14);<br>$\nu$ C3C4 (14)                         |
| 116 |      | 1471 | 1427 | 20.88 | $\nu$ C14C15 (16); $\nu$ C17C18 (14); $\beta$ H43C23C24<br>(12); $\beta$ H40C20C21 (10)                 |
| 117 | 1436 | 1487 | 1442 | 28.79 | $\beta$ H46C26H47 (12)                                                                                  |
| 118 |      | 1489 | 1444 | 14.43 | $\beta$ H50C28H51 (52); $\beta$ H52C29H53 (16);<br>$\beta$ H48C27H49 (20)                               |
| 119 |      | 1490 | 1445 | 19.32 | $\beta$ H48C27H49 (37); $\beta$ H52C29H53 (22)                                                          |
| 120 |      | 1497 | 1452 | 17.24 | $\beta$ H46C26H47 (36); $\beta$ H52C29H53 (12);<br>$\beta$ H55C30H56 (12)                               |
| 121 |      | 1503 | 1458 | 18.77 | $\beta$ H48C27H49 (11); $\beta$ H54C30H55 (14);<br>$\beta$ H55C30H56 (16); $\beta$ H44C25H45 (22)       |
| 122 |      | 1504 | 1459 | 12.66 | $\beta$ H54C30H56 (43); $\beta$ H54C30H55 (28);<br>$\tau$ H54C30C29C28 (14)                             |
| 123 |      | 1506 | 1461 | 30.17 | $\beta$ H35N9N10 (25)                                                                                   |
| 124 | 1465 | 1511 | 1466 | 3.36  | $\beta$ H55C30H56 (16); $\beta$ H44C25H45 (20);<br>$\beta$ H52C29H53 (22)                               |
| 125 |      | 1517 | 1471 | 13.56 | $\beta$ H50C28H51 (13); $\beta$ H44C25H45 (11)                                                          |
| 126 |      | 1518 | 1472 | 44.7  | $\beta$ H46C26H47 (16); $\beta$ H48C27H49 (16);<br>$\beta$ H52C29H53 (11)                               |
| 127 |      | 1521 | 1475 | 20.1  | $\beta$ H32C4N5 (12); $\beta$ H33C6N5 (13)                                                              |
| 128 | 1490 | 1526 | 1480 | 20.51 | $\beta$ H35N9N10 (13)                                                                                   |
| 129 | 1548 | 1594 | 1546 | 22.63 | $\nu$ N5C4 (15); $\nu$ N5C6 (16); $\nu$ C2C3 (24); $\nu$ C2C7<br>(24)                                   |
| 130 |      | 1606 | 1558 | 12.63 | $\nu$ C13C14 (25); $\nu$ C15C16 (10); $\nu$ C13C18 (17)                                                 |
| 131 |      | 1617 | 1568 | 3.97  | $\nu$ C19C24 (19); $\nu$ C21C22 (19); $\nu$ C19C20 (11)                                                 |
| 132 |      | 1633 | 1584 | 23.07 | $\nu$ C6C7 (17); $\nu$ C2C7 (10); $\nu$ C3C4 (15)                                                       |
| 133 |      | 1636 | 1587 | 41.15 | $\nu$ C17C18 (14)                                                                                       |
| 134 |      | 1657 | 1607 | 27.72 | $\nu$ C19C20 (14); $\nu$ C23C24 (11); $\nu$ N10C11 (18)                                                 |
| 135 | 1587 | 1674 | 1624 | 15.69 | $\nu$ N10C11 (70)                                                                                       |
| 136 | 1637 | 1741 | 1689 | 100   | $\nu$ O8C1 (88)                                                                                         |
| 137 | 2935 | 2995 | 3025 | 8.22  | $\nu$ C27H48 (39); $\nu$ C27H49 (38); $\nu$ C28H51 (11);<br>$\nu$ C28H50 (11)                           |
| 138 | 2960 | 3000 | 3030 | 9.08  | $\nu$ C28H51 (26); $\nu$ C28H50 (29); $\nu$ C29H52 (15);                                                |

|     |      |      |      |              |                                                                      |
|-----|------|------|------|--------------|----------------------------------------------------------------------|
|     |      |      |      | vC29H53 (15) |                                                                      |
| 139 |      | 3010 | 3040 | 30.94        | vC28H50 (13); vC29H52 (31); vC29H53 (36)                             |
| 140 |      | 3013 | 3043 | 4.9          | vC27H48 (24); vC27H49 (21); vC28H50 (18); vC28H51 (25)               |
| 141 |      | 3020 | 3050 | 33.39        | vC11H36 (100)                                                        |
| 142 |      | 3022 | 3052 | 24.11        | vC30H54 (25); vC30H55 (36); vC30H56 (35)                             |
| 143 |      | 3025 | 3055 | 19.3         | vC26H46 (46); vC26H47 (36)                                           |
| 144 |      | 3026 | 3056 | 4            | vC27H48 (18); vC27H49 (16); vC29H52 (23); vC29H53 (23)               |
| 145 |      | 3044 | 3074 | 32.17        | vC25H44 (46); vC25H45 (45)                                           |
| 146 |      | 3046 | 3076 | 20.51        | vC28H50 (18); vC28H51 (19); vC29H52 (16); vC29H53 (16); vC26H47 (10) |
| 147 |      | 3059 | 3090 | 20.59        | vC25H44 (11); vC25H45 (11); vC26H46 (24); vC26H47 (27)               |
| 148 |      | 3083 | 3114 | 28.44        | vC30H55 (44); vC30H56 (43)                                           |
| 149 |      | 3086 | 3117 | 27.7         | vC25H44 (36); vC25H45 (38); vC26H46 (10); vC26H47 (11)               |
| 150 |      | 3088 | 3119 | 27.61        | vC30H54 (74); vC30H55 (12); vC30H56 (13)                             |
| 151 |      | 3147 | 3178 | 21.29        | vC4H32 (89); vC6H33 (10)                                             |
| 152 |      | 3152 | 3184 | 18.54        | vC4H32 (10); vC6H33 (87)                                             |
| 153 |      | 3162 | 3194 | 12.67        | vC15H38 (90); vC14H37 (10)                                           |
| 154 |      | 3166 | 3198 | 2.74         | vC20H40 (20); vC21H41 (30); vC22H42 (41)                             |
| 155 |      | 3174 | 3206 | 9.22         | vC20H40 (53); vC22H42 (28); vC23H43 (14)                             |
| 156 | 3213 | 3186 | 3218 | 19.27        | vC20H40 (17); vC21H41 (28); vC23H43 (51)                             |
| 157 |      | 3189 | 3221 | 18.87        | vC14H37 (87)                                                         |
| 158 |      | 3193 | 3225 | 6.37         | vC17H39 (97)                                                         |
| 159 |      | 3194 | 3226 | 17.17        | vC21H41 (31); vC22H42 (23); vC23H43 (21)                             |
| 160 |      | 3208 | 3240 | 7.9          | vC7H34 (98)                                                          |
| 161 |      | 3230 | 3262 | 5.06         | vC3H31 (99)                                                          |
| 162 | 3587 | 3465 | 3500 | 10.24        | vN9H35 (100)                                                         |

---

v - stretching,  $\beta$  - in-plane bending,  $\tau$  - torsional vibrations,  $\Gamma$  - out of plane bending

**Table S4.** Experimental and calculated vibrational frequencies along with their proposed assignment of hydrazide **6c**

| Mode | Expt. Freq. | Calc. Freq. |        |                                                                                                                             | Vibrational Assignment with PED (%) |
|------|-------------|-------------|--------|-----------------------------------------------------------------------------------------------------------------------------|-------------------------------------|
|      |             | Unscaled    | Scaled | $I_{IR}$                                                                                                                    |                                     |
| 1    | 12          | 12          | 0.22   | $\tau$ C15C16C11N10 (50); $\tau$ C1N9N10C11 (24)                                                                            |                                     |
| 2    | 17          | 16          | 1.18   | $\tau$ C13N12C25C26 (29); $\beta$ C16C11N10 (10)                                                                            |                                     |
| 3    | 20          | 19          | 1.94   | $\beta$ C1N9N10 (14); $\beta$ C11C16C17 (10);<br>$\beta$ C11N10N9 (11); $\tau$ C13N12C25C26 (15);<br>$\beta$ C16C11N10 (14) |                                     |
| 4    | 25          | 24          | 0.62   | $\Gamma$ C25C13C24N12 (37)                                                                                                  |                                     |
| 5    | 39          | 38          | 1.03   | $\Gamma$ C25C13C24N12 (18); $\tau$ C7C2C1N9 (22);<br>$\tau$ C2C1N9N10 (17)                                                  |                                     |
| 6    | 49          | 48          | 0.93   | $\tau$ C7C2C1N9 (25)                                                                                                        |                                     |
| 7    | 69          | 67          | 0.47   | $\tau$ C27C26C25N12 (44)                                                                                                    |                                     |
| 8    | 71          | 69          | 1.27   | $\tau$ C27C26C25N12 (18)                                                                                                    |                                     |
| 9    | 86          | 83          | 1.85   | $\Gamma$ Br50C20C22C21 (11); $\Gamma$ C18C19C24C20 (16)                                                                     |                                     |
| 10   | 98          | 95          | 5.8    | $\tau$ C7C2C1N9 (16); $\tau$ C1N9N10C11 (13);<br>$\tau$ C2C1N9N10 (12)                                                      |                                     |
| 11   | 109         | 106         | 0.4    | $\tau$ C27C26C25N12 (14); $\tau$ C25C26C27C28 (54)                                                                          |                                     |
| 12   | 124         | 120         | 2.75   | $\tau$ C19C24C22C23 (13); $\tau$ C1N9N10C11 (10)                                                                            |                                     |
| 13   | 135         | 131         | 2.96   | $\Gamma$ C1C2C7C3 (24); $\beta$ C22C21Br50 (14)                                                                             |                                     |
| 14   | 169         | 164         | 3.98   | $\tau$ C15C16C11N10 (12)                                                                                                    |                                     |
| 15   | 187         | 181         | 4.16   | $\beta$ C25C26C27 (13)                                                                                                      |                                     |
| 16   | 203         | 197         | 3.2    | $\beta$ C25C26C27 (14)                                                                                                      |                                     |
| 17   | 213         | 207         | 6.74   | $\beta$ C1C2C7 (18)                                                                                                         |                                     |
| 18   | 217         | 210         | 9.67   | $\Gamma$ Br50C20C22C21 (10)                                                                                                 |                                     |
| 19   | 228         | 221         | 4.43   | $\nu$ Br50C21 (10); $\beta$ C24N12C25 (12);<br>$\tau$ H47C28C27C26 (11)                                                     |                                     |
| 20   | 242         | 235         | 4.19   | $\nu$ Br50C21 (10); $\tau$ H48C28C27C26 (10);<br>$\tau$ H47C28C27C26 (23)                                                   |                                     |
| 21   | 251         | 243         | 11.83  | $\beta$ C1C2C7 (15)                                                                                                         |                                     |
| 22   | 262         | 254         | 8.1    | $\beta$ C1C2C7 (12); $\beta$ C22C21Br50 (10)                                                                                |                                     |
| 23   | 289         | 280         | 11.63  | $\tau$ C16C11N10N9 (24); $\tau$ C2C1N9N10 (11);<br>$\tau$ C13C18C16C17 (10)                                                 |                                     |
| 24   | 314         | 305         | 5.36   | $\nu$ Br50C21 (15); $\beta$ C24N12C25 (14)                                                                                  |                                     |
| 25   | 326         | 316         | 0.76   | $\beta$ C24N12C25 (12); $\beta$ C22C21Br50 (14)                                                                             |                                     |
| 26   | 353         | 342         | 2.77   | $\Gamma$ Br50C20C22C21 (13); $\tau$ C15C14C16C17 (12);<br>$\beta$ C26C27C28 (12)                                            |                                     |

|    |     |     |     |       |                                                                                                                                              |
|----|-----|-----|-----|-------|----------------------------------------------------------------------------------------------------------------------------------------------|
| 27 |     | 369 | 358 | 7.7   | $\beta$ N9C1O8 (14); $\beta$ C4N5C6 (12); $\nu$ C1C2 (22)                                                                                    |
| 28 |     | 391 | 379 | 1.43  | $\tau$ C7C4C6N5 (17); $\tau$ C2C7N5C6 (15);<br>$\tau$ C4C3N5C6 (31); $\tau$ H29C3C4N5 (10);<br>$\tau$ H32C7C6N5 (10)                         |
| 29 |     | 399 | 387 | 5.5   | $\beta$ C26C27C28 (21); $\tau$ C17C18C19C24 (14)                                                                                             |
| 30 |     | 419 | 406 | 14.56 | $\beta$ C2C1N9 (11); $\tau$ C7C4C6N5 (15); $\beta$ C16C17C18 (10)                                                                            |
| 31 | 426 | 433 | 420 | 9.39  | $\tau$ C22C21C23C24 (20); $\Gamma$ C18C19C24C20 (14);<br>$\tau$ C13C18C16C17 (16)                                                            |
| 32 |     | 445 | 432 | 6.3   | $\beta$ C26C25N12 (18); $\beta$ C26C27C28 (15);<br>$\tau$ C17C18C19C24 (10)                                                                  |
| 33 |     | 460 | 446 | 7.3   | $\tau$ C13C18C14C15 (26); $\Gamma$ C11C15C17C16 (11)                                                                                         |
| 34 |     | 477 | 463 | 16.08 | $\beta$ C16C17C18 (11)                                                                                                                       |
| 35 |     | 498 | 483 | 25.96 | $\beta$ C16C11N10 (10)                                                                                                                       |
| 36 |     | 554 | 537 | 18.21 | $\beta$ C17C18C19 (17)                                                                                                                       |
| 37 |     | 581 | 564 | 12.37 | $\tau$ C22C21C23C24 (19); $\tau$ C21C20C22C23 (32)                                                                                           |
| 38 |     | 594 | 576 | 18.51 | $\beta$ N9C1O8 (11); $\beta$ C14C15C16 (10)                                                                                                  |
| 39 |     | 616 | 598 | 22.57 | $\tau$ H33N9N10C11 (69)                                                                                                                      |
| 40 |     | 628 | 609 | 13.45 | $\tau$ C15C14C16C17 (17); $\Gamma$ C11C15C17C16 (29);<br>$\Gamma$ C19C13C17C18 (13)                                                          |
| 41 |     | 649 | 630 | 10.92 | $\beta$ C16C17C18 (10)                                                                                                                       |
| 42 |     | 651 | 631 | 18.07 | $\beta$ C14C13C18 (36)                                                                                                                       |
| 43 |     | 655 | 635 | 30.49 | $\beta$ C21C22C23 (13); $\beta$ C18C19C24 (10)                                                                                               |
| 44 |     | 679 | 659 | 8.46  | $\beta$ C7C6N5 (14)                                                                                                                          |
| 45 |     | 687 | 666 | 5.33  | $\beta$ C3C4N5 (21)                                                                                                                          |
| 46 | 683 | 726 | 704 | 29.66 | $\tau$ C2C7N5C6 (22); $\tau$ C4C3N5C6 (10);<br>$\Gamma$ O8C2N9C1 (33)                                                                        |
| 47 |     | 739 | 717 | 5.87  | $\tau$ H43C26C27C28 (20); $\tau$ H45C27C26C25 (20);<br>$\beta$ H43C26C27 (16); $\beta$ H45C27C28 (12)                                        |
| 48 |     | 745 | 723 | 7.42  | $\Gamma$ C18C19C24C20 (12); $\Gamma$ N12C19C23C24 (19)                                                                                       |
| 49 |     | 751 | 728 | 11.42 | $\Gamma$ N12C19C23C24 (11)                                                                                                                   |
| 50 |     | 755 | 732 | 3.34  | $\nu$ C1C2 (11)                                                                                                                              |
| 51 |     | 773 | 750 | 19.76 | $\tau$ C7C4C6N5 (10); $\tau$ C2C7N5C6 (27);<br>$\tau$ C4C3N5C6 (12); $\Gamma$ O8C2N9C1 (14);<br>$\tau$ H29C3C4N5 (14); $\tau$ H32C7C6N5 (13) |
| 52 |     | 775 | 752 | 3.04  | $\tau$ C13C18C14C15 (11); $\Gamma$ C19C13C17C18 (23);<br>$\tau$ C13C18C16C17 (11)                                                            |
| 53 |     | 793 | 769 | 4.31  | $\tau$ H41C25N12C13 (10); $\tau$ H45C27C26C25 (10);<br>$\tau$ H47C28C27C26 (16); $\tau$ H44C26C27C28 (11)                                    |
| 54 |     | 808 | 784 | 16.93 | $\tau$ H39C22C23C24 (35); $\tau$ H40C23C24N12 (44)                                                                                           |

|    |     |      |      |       |                                                                                                                           |
|----|-----|------|------|-------|---------------------------------------------------------------------------------------------------------------------------|
| 55 |     | 814  | 790  | 21.8  | $\tau$ H35C14C15C16 (22); $\tau$ H36C15C16C11 (17)                                                                        |
| 56 | 799 | 816  | 792  | 16.63 | $\tau$ H35C14C15C16 (21); $\tau$ H36C15C16C11 (15)                                                                        |
| 57 | 843 | 863  | 837  | 19.89 | $\Gamma$ O8C2N9C1 (19); $\Gamma$ C1C2C7C3 (19);<br>$\tau$ H29C3C4N5 (18); $\tau$ H30C4N5C6 (18);<br>$\tau$ H31C6N5C4 (11) |
| 58 |     | 879  | 853  | 8.61  | $\beta$ C20C21C22 (10)                                                                                                    |
| 59 |     | 892  | 865  | 12.09 | $\tau$ H38C20C21C22 (78)                                                                                                  |
| 60 |     | 898  | 871  | 7.18  | $\tau$ H29C3C4N5 (29); $\tau$ H31C6N5C4 (21);<br>$\tau$ H32C7C6N5 (39)                                                    |
| 61 |     | 911  | 884  | 5.84  | $\tau$ H48C28C27C26 (16); $\tau$ H49C28C27C26 (16);<br>$\nu$ C26C27 (26); $\nu$ C27C28 (15)                               |
| 62 |     | 924  | 896  | 5.67  | $\tau$ H37C17C18C13 (62); $\tau$ C13C18C16C17 (11);<br>$\tau$ H34C11N10N9 (11)                                            |
| 63 |     | 940  | 912  | 6.37  | $\tau$ H35C14C15C16 (19); $\tau$ H36C15C16C11 (30);<br>$\tau$ H39C22C23C24 (12); $\tau$ H40C23C24N12 (10)                 |
| 64 |     | 942  | 914  | 3.46  | $\tau$ H39C22C23C24 (37); $\tau$ H40C23C24N12 (30)                                                                        |
| 65 |     | 946  | 918  | 21.02 | $\nu$ C16C17 (18)                                                                                                         |
| 66 | 932 | 961  | 932  | 2.89  | $\tau$ H47C28C27C26 (10); $\beta$ H43C26C27 (19);<br>$\beta$ H45C27C28 (10)                                               |
| 67 |     | 968  | 939  | 14.34 | $\tau$ H36C15C16C11 (14); $\tau$ H34C11N10N9 (71)                                                                         |
| 68 |     | 992  | 962  | 4.58  | $\tau$ H29C3C4N5 (22); $\tau$ C4C3N5C6 (10);<br>$\tau$ H30C4N5C6 (34); $\tau$ H31C6N5C4 (10);<br>$\tau$ H32C7C6N5 (16)    |
| 69 | 976 | 1005 | 975  | 6.43  | $\nu$ C25C26 (49); $\nu$ C27C28 (30)                                                                                      |
| 70 |     | 1007 | 977  | 7.32  | $\tau$ H30C4N5C6 (19); $\tau$ H31C6N5C4 (35);<br>$\tau$ H32C7C6N5 (12)                                                    |
| 71 |     | 1013 | 983  | 7.6   | $\beta$ C4N5C6 (12); $\beta$ C3C4N5 (14); $\beta$ C7C6N5 (16);<br>$\nu$ N5C4 (15); $\nu$ N5C6 (16)                        |
| 72 |     | 1039 | 1008 | 13.41 | $\nu$ C21C22 (29)                                                                                                         |
| 73 |     | 1055 | 1023 | 2.49  | $\nu$ C25C26 (16); $\nu$ C27C28 (37); $\nu$ C26C27 (37)                                                                   |
| 74 |     | 1071 | 1039 | 15.43 | $\nu$ C20C21 (16); $\beta$ H38C20C21 (10)                                                                                 |
| 75 |     | 1083 | 1051 | 14.23 | $\beta$ C22C23C24 (18); $\beta$ C20C21C22 (17); $\nu$ N12C25<br>(20)                                                      |
| 76 |     | 1094 | 1061 | 15.8  | $\beta$ C3C4N5 (19); $\beta$ C7C6N5 (25); $\beta$ H32C7C6 (18)                                                            |
| 77 |     | 1111 | 1078 | 2.21  | $\beta$ H32C7C6 (15); $\nu$ C3C4 (23); $\beta$ H29C3C4 (22);<br>$\nu$ C6C7 (16)                                           |
| 78 |     | 1129 | 1095 | 12.98 | $\tau$ H48C28C27C26 (16); $\tau$ H49C28C27C26 (16);<br>$\nu$ C26C27 (15); $\beta$ C25C26C27 (10)                          |
| 79 |     | 1132 | 1098 | 14.82 | $\nu$ N9N10 (21); $\nu$ C2C7 (12)                                                                                         |
| 80 |     | 1153 | 1118 | 35.36 | $\beta$ H35C14C15 (16)                                                                                                    |
| 81 |     | 1169 | 1134 | 43.09 | $\nu$ N9N10 (20); $\beta$ H39C22C23 (10)                                                                                  |

|     |      |      |      |       |                                                                                                                |
|-----|------|------|------|-------|----------------------------------------------------------------------------------------------------------------|
| 82  |      | 1172 | 1137 | 13.21 | $\beta$ H39C22C23 (17); vC22C23 (14);                                                                          |
| 83  | 1148 | 1178 | 1143 | 12.83 | $\beta$ H36C15C16 (24); vN9N10 (10); $\beta$ H35C14C15 (11); vC14C15 (12)                                      |
| 84  |      | 1210 | 1174 | 26.96 | vC11C16 (18); vC18C19 (14)                                                                                     |
| 85  |      | 1237 | 1200 | 31.21 | $\beta$ H43C26C27 (10); $\beta$ H41C25C26 (14)                                                                 |
| 86  |      | 1243 | 1206 | 11.44 | $\beta$ H32C7C6 (11); $\beta$ H29C3C4 (10); $\beta$ H30C4N5 (23); vN5C4 (11); vN5C6 (12); $\beta$ H31C6N5 (20) |
| 87  | 1213 | 1249 | 1212 | 29.53 | vC18C19 (10); $\beta$ H37C17C18 (12)                                                                           |
| 88  |      | 1271 | 1233 | 20.6  | $\beta$ H38C20C21 (16); $\beta$ H43C26C27 (10)                                                                 |
| 89  | 1244 | 1275 | 1237 | 10.18 | vN5C4 (27); vN5C6 (24); vC6C7 (10); vC2C7 (12); vC2C3 (15)                                                     |
| 90  |      | 1293 | 1254 | 20.75 | $\beta$ H37C17C18 (12); $\beta$ H38C20C21 (18); $\beta$ H34C11N10 (10)                                         |
| 91  |      | 1296 | 1257 | 13.99 | $\tau$ H43C26C27C28 (19); $\tau$ H44C26C27C28 (23)                                                             |
| 92  |      | 1310 | 1271 | 40.75 | $\beta$ H45C27C28 (12)                                                                                         |
| 93  | 1281 | 1328 | 1288 | 26.72 | $\beta$ H45C27C28 (24); $\beta$ H41C25C26 (14)                                                                 |
| 94  | 1298 | 1334 | 1294 | 14.13 | $\beta$ H43C26C27 (30); $\beta$ H45C27C28 (16); $\beta$ H41C25C26 (11); $\tau$ H44C26C27C28 (10)               |
| 95  |      | 1344 | 1304 | 80.2  | vC1C2 (11); $\beta$ H29C3C4 (13); vN9C1 (20)                                                                   |
| 96  |      | 1354 | 1313 | 19.21 | $\beta$ H29C3C4 (12); $\beta$ H32C7C6 (11); $\beta$ H31C6N5 (10)                                               |
| 97  |      | 1360 | 1319 | 48.76 | vN9C1 (11); $\beta$ H31C6N5 (11)                                                                               |
| 98  | 1329 | 1374 | 1333 | 44.51 | vN12C25 (20); vN12C13 (16); vN12C24 (15)                                                                       |
| 99  |      | 1384 | 1342 | 3.44  | $\tau$ H41C25N12C13 (10); $\tau$ H45C27C26C25 (12); $\tau$ H46C27C26C25 (23); $\tau$ H42C25N12C13 (13)         |
| 100 | 1352 | 1390 | 1348 | 35.54 | $\beta$ H34C11N10 (40); $\beta$ H33N9N10 (22)                                                                  |
| 101 |      | 1406 | 1364 | 16.5  | $\tau$ H42C25N12C13 (13); $\tau$ H43C26C27C28 (11); $\tau$ H44C26C27C28 (13)                                   |
| 102 |      | 1414 | 1372 | 19.71 | $\beta$ H41C25C26 (11); vN12C13 (10); vN12C24 (10)                                                             |
| 103 | 1383 | 1417 | 1374 | 8.44  | $\beta$ H47C28H49 (27); $\beta$ H47C28H48 (28); $\beta$ H48C28H49 (24)                                         |
| 104 |      | 1440 | 1397 | 21.59 | $\beta$ H30C4N5 (28); $\beta$ H31C6N5 (22); vC6C7 (15); vC3C4 (14)                                             |
| 105 | 1408 | 1453 | 1409 | 8.07  | $\beta$ H35C14C15 (10); $\beta$ H40C23C24 (11); vC14C15 (13); vC22C23 (15); vC19C20 (10)                       |
| 106 | 1439 | 1474 | 1430 | 42.11 | $\beta$ H39C22C23 (13); vC20C21 (21)                                                                           |
| 107 |      | 1492 | 1447 | 6.58  | $\beta$ H45C27H46 (44); $\beta$ H43C26H44 (37)                                                                 |
| 108 |      | 1494 | 1449 | 11.23 | $\beta$ H45C27H46 (13); $\beta$ H43C26H44 (15); $\beta$ H48C28H49 (13); $\beta$ H41C25H42 (24)                 |
| 109 |      | 1500 | 1455 | 15.28 | $\beta$ H47C28H49 (34); $\beta$ H47C28H48 (40);                                                                |

|     |      |      |      |       |                                                                                                   |
|-----|------|------|------|-------|---------------------------------------------------------------------------------------------------|
|     |      |      |      |       | $\tau$ H47C28C27C26 (14)                                                                          |
| 110 |      | 1502 | 1457 | 47.85 | $\beta$ H43C26H44 (12); $\beta$ H33N9N10 (10)                                                     |
| 111 |      | 1505 | 1460 | 29.52 | $\beta$ H33N9N10 (19); $\beta$ H41C25H42 (11)                                                     |
| 112 |      | 1507 | 1462 | 19.3  | $\beta$ H41C25H42 (14); $\beta$ H48C28H49 (11)                                                    |
| 113 | 1468 | 1516 | 1471 | 18.24 | $\beta$ H41C25H42 (15); $\beta$ H43C26H44 (21);<br>$\beta$ H45C27H46 (29); $\beta$ H48C28H49 (11) |
| 114 |      | 1520 | 1474 | 13.48 | $\beta$ H30C4N5 (12); $\beta$ H31C6N5 (13)                                                        |
| 115 | 1491 | 1525 | 1479 | 24.09 | $\beta$ H33N9N10 (12)                                                                             |
| 116 |      | 1595 | 1547 | 22.14 | vN5C4 (15); vN5C6 (16); vC2C7 (25); vC2C3<br>(24)                                                 |
| 117 | 1555 | 1603 | 1555 | 10.69 | vC21C22 (17); vC19C24 (23); vC19C20 (12)                                                          |
| 118 |      | 1606 | 1558 | 12.11 | vC13C14 (25); vC15C16 (10); vC13C18 (17)                                                          |
| 119 |      | 1631 | 1582 | 29.91 | vC19C20 (10); vC23C24 (15); vC17C18 (12)                                                          |
| 120 |      | 1634 | 1585 | 14.3  | vC6C7 (19); vC2C7 (13); vC2C3 (11); vC3C4<br>(18)                                                 |
| 121 |      | 1653 | 1603 | 31.12 | vC17C18 (11); vN10C11 (19)                                                                        |
| 122 | 1589 | 1675 | 1625 | 21.35 | vN10C11 (52)                                                                                      |
| 123 | 1643 | 1744 | 1692 | 100   | vO8C1 (79)                                                                                        |
| 124 | 2870 | 3006 | 2916 | 18.15 | vC27H45 (48); vC27H46 (46)                                                                        |
| 125 |      | 3021 | 2930 | 12.09 | vC11H34 (100)                                                                                     |
| 126 |      | 3022 | 2931 | 36.33 | vC26H44 (28); vC26H43 (25); vC28H48 (17);<br>vC28H49 (15)                                         |
| 127 |      | 3026 | 2935 | 23.23 | vC26H44 (21); vC28H47 (16); vC26H43 (12);<br>vC28H48 (18); vC28H49 (23)                           |
| 128 |      | 3028 | 2937 | 11.32 | vC27H45 (36); vC27H46 (43); vC26H43 (13)                                                          |
| 129 | 2953 | 3043 | 2952 | 31.9  | vC25H41 (42); vC25H42 (48)                                                                        |
| 130 |      | 3056 | 2964 | 9.34  | vC26H43 (32); vC26H44 (31); vC25H41 (12);<br>vC25H42 (10)                                         |
| 131 |      | 3083 | 2991 | 0.85  | vC25H41 (29); vC25H42 (26); vC28H48 (18);<br>vC28H49 (18)                                         |
| 132 |      | 3088 | 2995 | 34.56 | vC25H41 (12); vC25H42 (11); vC28H48 (26);<br>vC28H49 (29)                                         |
| 133 |      | 3092 | 2999 | 27.47 | vC28H47 (74); vC28H48 (14); vC28H49 (11)                                                          |
| 134 |      | 3148 | 3054 | 21.71 | vC4H30 (84); vC6H31 (15)                                                                          |
| 135 |      | 3153 | 3058 | 17.3  | vC4H30 (15); vC6H31 (83)                                                                          |
| 136 |      | 3164 | 3069 | 12.53 | vC15H36 (91)                                                                                      |
| 137 |      | 3186 | 3090 | 11.13 | vC22H39 (16); vC23H40 (84)                                                                        |
| 138 |      | 3192 | 3096 | 17.2  | vC14H35 (83)                                                                                      |
| 139 |      | 3194 | 3098 | 3.64  | vC17H37 (90)                                                                                      |

|     |      |      |      |       |                            |
|-----|------|------|------|-------|----------------------------|
| 140 |      | 3200 | 3104 | 2.13  | vC20H38 (97)               |
| 141 |      | 3206 | 3110 | 8.17  | vC22H39 (83); vC23H40 (16) |
| 142 |      | 3207 | 3111 | 7.89  | vC7H32 (97)                |
| 143 | 3221 | 3227 | 3130 | 5.73  | vC3H29 (99)                |
| 144 | 3400 | 3465 | 3361 | 10.04 | vN9H33 (100)               |

---

v - stretching,  $\beta$  - in-plane bending,  $\tau$  - torsional vibrations,  $\Gamma$  - out of plane bending



**Table S5.** Experimental and calculated <sup>1</sup>H chemical shift values of hydrazides **6a-c**

| Hydrazide <b>6a</b> |       |       | Hydrazide <b>6b</b> |       |       | Hydrazide <b>6c</b> |       |       |
|---------------------|-------|-------|---------------------|-------|-------|---------------------|-------|-------|
| Atom                | Calc. | Expt. | Atom                | Calc. | Expt. | Atom                | Calc. | Expt. |
| H29                 | 8.28  | 8.79  | H31                 | 8.31  | 8.64  | H29                 | 8.15  | 8.50  |
| H30                 | 8.80  | 8.81  | H32                 | 8.75  | 8.81  | H30                 | 8.69  | 8.80  |
| H31                 | 8.74  | 8.80  | H33                 | 8.73  | 8.80  | H31                 | 8.58  | 8.79  |
| H32                 | 7.84  | 8.64  | H34                 | 7.83  | 8.50  | H32                 | 7.73  | 7.91  |
| H33                 | 8.13  | 12.03 | H35                 | 8.17  | 12.03 | H33                 | 7.99  | 12.02 |
| H34                 | 7.72  | 7.87  | H36                 | 7.73  | 7.91  | H34                 | 7.60  | 7.85  |
| H35                 | 7.32  | 7.46  | H37                 | 7.42  | 7.49  | H35                 | 7.21  | 7.48  |
| H36                 | 7.44  | 7.67  | H38                 | 7.43  | 7.86  | H36                 | 7.28  | 7.64  |
| H37                 | 8.68  | 8.29  | H39                 | 8.69  | 8.25  | H37                 | 8.63  | 8.63  |
| H38                 | 8.08  | 8.23  | H40                 | 8.05  | 8.23  | H38                 | 7.98  | 8.25  |
| H39                 | 7.18  | 7.22  | H41                 | 7.17  | 7.23  | H39                 | 7.29  | 7.70  |
| H40                 | 7.45  | 7.86  | H42                 | 7.41  | 7.68  | H40                 | 7.09  | 7.24  |
| H41                 | 7.35  | 7.61  | H43                 | 7.41  | 7.61  | H41                 | 3.95  | 4.44  |
| H42                 | 4.15  | 4.41  | H44                 | 4.11  | 4.40  | H42                 | 3.96  | 4.44  |
| H43                 | 4.14  | 4.38  | H45                 | 4.12  | 4.40  | H43                 | 1.50  | 1.77  |
| H44                 | 1.62  | 1.77  | H46                 | 1.64  | 1.76  | H44                 | 1.45  | 1.77  |
| H45                 | 1.53  | 1.70  | H47                 | 1.63  | 1.76  | H45                 | 1.33  | 1.33  |
| H46                 | 1.44  | 1.33  | H48                 | 1.41  | 1.25  | H46                 | 1.33  | 1.31  |
| H47                 | 1.46  | 1.24  | H49                 | 1.38  | 1.25  | H47                 | 1.09  | 0.91  |
| H48                 | 1.15  | 0.90  | H50                 | 1.15  | 1.25  | H48                 | 0.75  | 0.88  |
| H49                 | 0.78  | 0.87  | H51                 | 1.16  | 1.21  | H49                 | 0.76  | 0.89  |
| H50                 | 0.77  | 0.86  | H52                 | 1.29  | 1.21  |                     |       |       |
|                     |       |       | H53                 | 1.30  | 1.21  |                     |       |       |
|                     |       |       | H54                 | 1.10  | 0.80  |                     |       |       |
|                     |       |       | H55                 | 0.70  | 0.78  |                     |       |       |
|                     |       |       | H56                 | 0.71  | 0.78  |                     |       |       |

**Table S6.** Experimental and calculated  $^{13}\text{C}$  chemical shift values of hydrazides **6a-c**

| Hydrazide <b>6a</b> |       |       | Hydrazide <b>6b</b> |       |       | Hydrazide <b>6a</b> |       |       |
|---------------------|-------|-------|---------------------|-------|-------|---------------------|-------|-------|
| Atom                | Calc. | Expt. | Atom                | Calc. | Expt. | Atom                | Calc. | Expt. |
| C1                  | 162.1 | 161.8 | C1                  | 162.5 | 161.8 | C1                  | 161.8 | 161.1 |
| C2                  | 138.0 | 140.9 | C2                  | 138.2 | 140.9 | C2                  | 137.9 | 126.7 |
| C3                  | 123.3 | 123.7 | C3                  | 123.4 | 123.7 | C3                  | 123.2 | 123.7 |
| C4                  | 147.2 | 150.7 | C4                  | 147.4 | 150.7 | C4                  | 147.2 | 141.7 |
| C6                  | 148.4 | 150.7 | C6                  | 148.5 | 150.7 | C6                  | 148.1 | 150.7 |
| C7                  | 122.6 | 122.7 | C7                  | 122.5 | 122.7 | C7                  | 122.2 | 122.0 |
| C11                 | 141.4 | 150.0 | C11                 | 141.3 | 150.0 | C11                 | 140.8 | 141.4 |
| C13                 | 140.3 | 141.7 | C13                 | 140.5 | 141.7 | C13                 | 140.0 | 141.2 |
| C14                 | 105.6 | 110.1 | C14                 | 105.9 | 110.1 | C14                 | 106.3 | 110.1 |
| C15                 | 126.8 | 126.7 | C15                 | 126.7 | 126.7 | C15                 | 127.0 | 125.1 |
| C16                 | 123.3 | 125.1 | C16                 | 122.8 | 125.1 | C16                 | 122.8 | 122.7 |
| C17                 | 114.0 | 119.8 | C17                 | 114.2 | 119.8 | C17                 | 114.5 | 119.8 |
| C18                 | 122.9 | 122.7 | C18                 | 123.2 | 122.7 | C18                 | 121.3 | 121.1 |
| C19                 | 122.1 | 122.4 | C19                 | 122.2 | 122.4 | C19                 | 122.7 | 122.4 |
| C20                 | 118.4 | 121.1 | C20                 | 118.9 | 121.1 | C20                 | 121.0 | 120.8 |
| C21                 | 117.0 | 120.8 | C21                 | 117.0 | 120.8 | C21                 | 127.2 | 125.4 |
| C22                 | 123.8 | 125.3 | C22                 | 123.8 | 125.3 | C22                 | 126.5 | 124.0 |
| C23                 | 106.3 | 110.3 | C23                 | 106.3 | 110.3 | C23                 | 107.5 | 110.2 |
| C24                 | 139.9 | 141.2 | C24                 | 140.2 | 141.2 | C24                 | 138.5 | 140.9 |
| C25                 | 43.7  | 42.6  | C25                 | 43.7  | 42.8  | C25                 | 43.5  | 42.6  |
| C26                 | 31.6  | 31.1  | C26                 | 30.4  | 31.4  | C26                 | 31.0  | 31.1  |
| C27                 | 22.3  | 20.2  | C27                 | 30.1  | 28.9  | C27                 | 21.6  | 20.2  |
| C28                 | 13.5  | 14.1  | C28                 | 34.2  | 26.5  | C28                 | 13.2  | 14.1  |
|                     |       |       | C29                 | 26.1  | 22.4  |                     |       |       |
|                     |       |       | C30                 | 13.8  | 14.2  |                     |       |       |
